# Supplementary material
Source: publisher site journal article supplement (https://www.dovepress.com/article/581524)
Supplement: Supplementary file 1 [file 581524_Additional%20Files.pdf]

# Table of Contents

|                                                                                                                                                                                                                                                                                          |    |
|------------------------------------------------------------------------------------------------------------------------------------------------------------------------------------------------------------------------------------------------------------------------------------------|----|
| Additional File 1: Code definitions of various clinical characteristics evaluated at baseline                                                                                                                                                                                            | 2  |
| Additional File 2: Baseline Characteristics of Individuals with COVID-19 (PCR positive for SARS COV-2 or U07.1 diagnosis code in any setting) between April 1, 2020 to March 31, 2021 and with All SES Indicators Available in the Sentinel Distributed Database, Overall and by Race    | 6  |
| Additional File 3: Baseline Characteristics of Individuals with COVID-19 (PCR positive for SARS COV-2 or U07.1 diagnosis code in any setting) between April 1, 2020 to March 31, 2021 in the Sentinel Distributed Database, Overall and by COVID Hospitalization Outcome Status          | 15 |
| Additional File 4: Baseline Characteristics of Individuals Hospitalized with COVID-19 (U07.1 diagnosis code in the inpatient care setting) between April 1, 2020 and March 31, 2021, and with All SES Indicators Available in the Sentinel Distributed Database, Overall and by Race     | 20 |
| Additional File 5: Baseline Characteristics of Individuals Hospitalized with COVID-19 (U07.1 diagnosis code in the inpatient care setting) between April 1, 2020 and March 31, 2021 in the Sentinel Distributed Database, Overall and by Evidence of Critical COVID Outcome              | 28 |
| Additional File 6: Baseline Characteristics of Individuals Hospitalized with COVID-19 (U07.1 diagnosis code in the inpatient care setting) between April 1, 2020 and March 31, 2021 in the Sentinel Distributed Database, Overall and by Evidence of Outcome of Recorded Inpatient Death | 33 |

# Additional File 1: Code definitions of various clinical characteristics evaluated at baseline

| Comorbidity/Health Condition | Code Type  | Codes                                                                                                                                                                                                                                                                                                                                                                                                                                                                                                                                                                                                                                                                                                                                                                                                                  |
|------------------------------|------------|------------------------------------------------------------------------------------------------------------------------------------------------------------------------------------------------------------------------------------------------------------------------------------------------------------------------------------------------------------------------------------------------------------------------------------------------------------------------------------------------------------------------------------------------------------------------------------------------------------------------------------------------------------------------------------------------------------------------------------------------------------------------------------------------------------------------|
| Adult BMI 19.9 or less       | ICD-10-CM  | Z68.1                                                                                                                                                                                                                                                                                                                                                                                                                                                                                                                                                                                                                                                                                                                                                                                                                  |
| Adult BMI 20-29              | ICD-10-CM  | Z68.2*                                                                                                                                                                                                                                                                                                                                                                                                                                                                                                                                                                                                                                                                                                                                                                                                                 |
| Adult BMI 30-39              | ICD-10-CM  | Z68.3*                                                                                                                                                                                                                                                                                                                                                                                                                                                                                                                                                                                                                                                                                                                                                                                                                 |
| Adult BMI 40 or greater      | ICD-10-CM  | Z68.4*                                                                                                                                                                                                                                                                                                                                                                                                                                                                                                                                                                                                                                                                                                                                                                                                                 |
| Alcohol Use Abuse            | ICD-10-CM  | F10.*, G62.1, I42.6, K29.2*, K70.*, R78.0, T51, T51.0, T51.0X*, T51.8, T51.8X*, T51.9*, Z65.8, Z71.4                                                                                                                                                                                                                                                                                                                                                                                                                                                                                                                                                                                                                                                                                                                   |
| Alcohol Use Abuse            | ICD-10-PCS | HZ2ZZZZ, HZ30ZZZ, HZ31ZZZ, HZ32ZZZ, HZ33ZZZ, HZ34ZZZ, HZ35ZZZ, HZ36ZZZ, HZ37ZZZ, HZ38ZZZ, HZ39ZZZ, HZ3BZZZ, HZ40ZZZ, HZ41ZZZ, HZ42ZZZ, HZ43ZZZ, HZ44ZZZ, HZ45ZZZ, HZ46ZZZ, HZ47ZZZ, HZ48ZZZ, HZ49ZZZ, HZ4BZZZ, HZ50ZZZ, HZ51ZZZ, HZ52ZZZ, HZ53ZZZ, HZ54ZZZ, HZ55ZZZ, HZ56ZZZ, HZ57ZZZ, HZ58ZZZ, HZ59ZZZ, HZ5BZZZ, HZ5CZZZ, HZ5DZZZ, HZ63ZZZ, HZ83ZZZ, HZ86ZZZ, HZ88ZZZ, HZ89ZZZ, HZ93ZZZ, HZ96ZZZ, HZ98ZZZ, HZ99ZZZ                                                                                                                                                                                                                                                                                                                                                                                                    |
| Any Cancer                   | ICD-10-CM  | C00-C14, C15-C26, C30-C39, C40-C41, C43, C4A, C45-C49, C50, C51-C58, C60-C63, C64-C68, C69-C72, C73-C75, C76-C80, C7A, C7B, C81-C96, D03, D45, O9A.1*, R97.21, D47.1, D47.3                                                                                                                                                                                                                                                                                                                                                                                                                                                                                                                                                                                                                                            |
| Asthma                       | ICD-10-CM  | J45*                                                                                                                                                                                                                                                                                                                                                                                                                                                                                                                                                                                                                                                                                                                                                                                                                   |
| Autoimmune Conditions        | ICD-10-CM  | D51.0, D69.0, D86.*, E27.1-E27.4, E89.6, G02, G70, G70.0*, G73.7, H01.12*, L93.*, L94.0, L94.1, L94.3, M05.2-M05.9, M06.0-M06.3, M06.8*, M06.9, M08.0*, M08.2-M08.4, M08.8*, M08.9*, M30.*, M31.0-M31.7, M32.*, M34.*, M35.0*, M35.2                                                                                                                                                                                                                                                                                                                                                                                                                                                                                                                                                                                   |
| Blood Stem Cell Transplant   | ICD-10-PCS | 30230AZ, 30230U2, 30230U3, 30230U4, 30230X0, 30230X1, 30230X2, 30230X3, 30230X4, 30230Y0, 30230Y1, 30230Y2, 30230Y3, 30230Y4, 30233AZ, 30233U2, 30233U3, 30233U4, 30233X0, 30233X1, 30233X2, 30233X3, 30233X4, 30233Y0, 30233Y1, 30233Y2, 30233Y3, 30233Y4, 30240AZ, 30240U2, 30240U3, 30240U4, 30240X0, 30240X1, 30240X2, 30240X3, 30240X4, 30240Y0, 30240Y1, 30240Y2, 30240Y3, 30240Y4, 30243AZ, 30243U2, 30243U3, 30243U4, 30243X0, 30243X1, 30243X2, 30243X3, 30243X4, 30243Y0, 30243Y1, 30243Y2, 30243Y3, 30243Y4, 30250X0, 30250X1, 30250Y0, 30250Y1, 30253X0, 30253X1, 30253Y0, 30253Y1, 30260X0, 30260X1, 30260Y0, 30260Y1, 30263X0, 30263X1, 30263Y0, 30263Y1, 3E0Q0AZ, 3E0Q0E0, 3E0Q0E1, 3E0Q3AZ, 3E0Q3E0, 3E0Q3E1, 3E0R0AZ, 3E0R0E0, 3E0R0E1, 3E0R3AZ, 3E0R3E0, 3E0R3E1, 6A550ZT, 6A550ZV, 6A551ZT, 6A551ZV |
| Blood Stem Cell Transplant   | CPT-4      | 38240, 38241, 38242, 38243                                                                                                                                                                                                                                                                                                                                                                                                                                                                                                                                                                                                                                                                                                                                                                                             |
| Chronic Kidney Disease       | ICD-10-CM  | E08.22, E08.29, E09.21, E09.22, E10.21, E10.22, E11.21, E11.22, E11.29, E13.21, E13.22, I12.0, I12.9, I13.0, I13.1, I13.10, I13.11, I13.2, K76.7, M32.14, M32.15, M35.04, N01-N08, N11-N16, N18.*, N19, N25.*, N26.1, N26.9, N28.89, N28.9, N29, Q61.02, Q61.11, Q61.19, Q61.2, Q61.3, Q61.4, Q61.5, Q61.8, Q62.0-Q62.3, R94.4, Z49.*, Z99.2                                                                                                                                                                                                                                                                                                                                                                                                                                                                           |
| Chronic Kidney Disease       | ICD-10-PCS | B50W, B50W0ZZ, B50W1ZZ, B50WYZZ, B51W, B51W0ZA, B51W0ZZ, B51W1ZA, B51W1ZZ, B51WYZA, B51WYZZ, B51WZZA, B51WZZZ                                                                                                                                                                                                                                                                                                                                                                                                                                                                                                                                                                                                                                                                                                          |
| Chronic Kidney Disease       | CPT-2      | 0507F, 4055F, 4053F, 4052F, 4054F, 0505F                                                                                                                                                                                                                                                                                                                                                                                                                                                                                                                                                                                                                                                                                                                                                                               |
| Chronic Kidney Disease       | CPT-4      | 90999, 90935, 90937, 90940, 90951, 90952, 90953, 90960, 90961, 90962, 90954, 90955, 90956, 90957, 90958, 90959, 90963, 90966, 90964, 90965, 90967, 90970, 90968, 90969, 90945, 90947, 90994, 90992, 90976, 90977, 90978, 90979, 90982, 90983, 90984, 90985, 99559, 93998, 36907, 36908, 35876, 35875, 90988, 36489, 36488, 36491, 36490, 36905, 36906, 36904, 37607, 36902, 36903, 36901, 36800, 36815, 36810, 99512, 90991, 90941, 90942, 90943, 90944, 90990, 90939, 93990, 93986, 93985, 36838, 36909, 35686, 36821, 36818, 36819, 36820, 49422, 49325, 49324, 49419, 49421, 49418, 49435                                                                                                                                                                                                                           |

| Comorbidity/Health Condition                 | Code Type  | Codes                                                                                                                                                                                                                                                                                                                                                                                                                                                                                                                                                     |
|----------------------------------------------|------------|-----------------------------------------------------------------------------------------------------------------------------------------------------------------------------------------------------------------------------------------------------------------------------------------------------------------------------------------------------------------------------------------------------------------------------------------------------------------------------------------------------------------------------------------------------------|
| Chronic Kidney Disease                       | HCPCS      | A4714, E1640, E1630, E1634, K0610, A4653, G8727, G9523, A4905, S9339, E1638, A4860, A4721, A4726, A4725, A4724, A4723, A4720, A4722, A4760, A4766, A4765, E1594, A4901, A4900, E1592, A4719, E1625, G0365, A4918, E1580, G0393, G0392, E1575, E1636, A4740, E1610, A4802, E1540, A4870, G9241, G9240, G8956, G9266, G9265, G8957, S9335, A4801, E1520, G8715, G8714, E1590, A4820, A4730, G8085, G8081, G8082, G9239, G9264, A4690, E1600, E1615, A4890, C1751, C1752, C1750, A4750, A4755, E1620, E1560, A4706, A4707, E1550, E1530, A4680, A4709, A4708 |
| Congestive Heart Failure                     | ICD-10-CM  | I09.81, I11.0, I13.0, I13.2, I50*, I97.13, I97.130, I97.131                                                                                                                                                                                                                                                                                                                                                                                                                                                                                               |
| Chronic Obstructive Pulmonary Disease (COPD) | ICD-10-CM  | J40, J41.*, J42, J43, J43.*, J44.*, J47.*, J43, J98.2, J98.3, P25, P25.*                                                                                                                                                                                                                                                                                                                                                                                                                                                                                  |
| Coronary Artery Disease                      | ICD-10-CM  | I20*, I23.7, I24-I25, I46*, I47.0, I47.2, I70*, T82.211A, T82.212A, T82.213A, T82.218A, Z95.1, Z95.5, Z98.61                                                                                                                                                                                                                                                                                                                                                                                                                                              |
| Coronary Artery Disease                      | ICD-10-PCS | 0270046, 027004Z, 0270056, 027005Z, 0270066, 027006Z, 0270076, 027007Z, 02700D6, 02700DZ, 02700E6, 02700EZ, 02700F6, 02700FZ, 02700G6, 02700GZ, 02700T6, 02700TZ, 02700Z6, 02700ZZ, 0270346, 027034Z, 0270356, 027035Z, 0270366, 027036Z, 0270376, 027037Z, 02703D6, 02703DZ, 02703E6, 02703EZ, 02703F6, 02703FZ, 02703G6, 02703GZ, 02703T6, 02703TZ, 0270446, 027044Z, 0270456, 027045Z, 0270466, 027046Z, 0270476, 027047Z, 02704D6, 02704DZ, 02704E6, 02704EZ                                                                                          |
|                                              |            | 02704F6, 02704FZ, 02704G6, 02704GZ, 02704T6, 02704TZ, 0271046, 027104Z, 0271056, 027105Z, 0271066, 027106Z, 0271076, 027107Z, 02710D6, 02710DZ, 02710E6, 02710EZ, 02710F6, 02710FZ, 02710G6, 02710GZ, 02710T6, 02710TZ, 02710Z6, 02710ZZ, 0271346, 027134Z, 0271356, 027135Z, 0271366, 027136Z, 0271376, 027137Z, 02713D6, 02713DZ, 02713E6, 02713EZ, 02713F6, 02713FZ, 02713G6, 02713GZ, 02713T6, 02713TZ, 0271446, 027144Z, 0271456, 027145Z, 0271466, 027146Z                                                                                          |
|                                              |            | 0271476, 027147Z, 02714D6, 02714DZ, 02714E6, 02714EZ, 02714F6, 02714FZ, 02714G6, 02714GZ, 02714T6, 02714TZ, 0272046, 027204Z, 0272056, 027205Z, 0272066, 027206Z, 0272076, 027207Z, 02720D6, 02720DZ, 02720E6, 02720EZ, 02720F6, 02720FZ, 02720G6, 02720GZ, 02720T6, 02720TZ, 02720Z6, 02720ZZ, 0272346, 027234Z, 0272356, 027235Z, 0272366, 027236Z, 0272376, 027237Z, 02723D6, 02723DZ, 02723E6, 02723EZ, 02723F6, 02723FZ, 02723G6, 02723GZ, 02723T6, 02723TZ                                                                                          |
|                                              |            | 0272446, 027244Z, 0272456, 027245Z, 0272466, 027246Z, 0272476, 027247Z, 02724D6, 02724DZ, 02724E6, 02724EZ, 02724F6, 02724FZ, 02724G6, 02724GZ, 02724T6, 02724TZ, 0273046, 027304Z, 0273056, 027305Z, 0273066, 027306Z, 0273076, 027307Z, 02730D6, 02730DZ, 02730E6, 02730EZ, 02730F6, 02730FZ, 02730G6, 02730GZ, 02730T6, 02730TZ, 02730Z6, 02730ZZ, 0273346, 027334Z, 0273356, 027335Z, 0273366, 027336Z, 0273376, 027337Z, 02733D6, 02733DZ, 02733E6, 02733EZ                                                                                          |
|                                              |            | 02733F6, 02733FZ, 02733G6, 02733GZ, 02733T6, 02733TZ, 0273446, 027344Z, 0273456, 027345Z, 0273466, 027346Z, 0273476, 027347Z, 02734D6, 02734DZ, 02734E6, 02734EZ, 02734F6, 02734FZ, 02734G6, 02734GZ, 02734T6, 02734TZ, 02C00Z6, 02C00ZZ, 02C03Z6, 02C03ZZ, 02C04Z6, 02C04ZZ, 02C10Z6, 02C10ZZ, 02C13Z6, 02C13ZZ, 02C14Z6, 02C14ZZ, 02C20Z6, 02C20ZZ, 02C23Z6, 02C23ZZ, 02C24Z6, 02C24ZZ, 02C30Z6, 02C30ZZ, 02C33Z6, 02C33ZZ, 02C34Z6, 02C34ZZ, 3E07017, 3E070PZ                                                                                          |
|                                              |            | 3E07317, 3E073PZ, 4A020N7, 4A020N8, 4A023N7, 4A023N8, 4A12XSH, X2C0361, X2C1361, X2C2361, X2C3361, 0210083, 0210088, 0210089, 021008C, 021008F, 021008W, 0210093, 0210098, 0210099, 021009C, 021009F, 021009W, 02100A3, 02100A8, 02100A9, 02100AC, 02100AF, 02100AW, 02100J3, 02100J8, 02100J9, 02100JC, 02100JF, 02100JW, 02100K3, 02100K8, 02100K9, 02100KC, 02100KF, 02100KW, 02100Z3, 02100Z8, 02100Z9, 02100ZC, 02100ZF, 0210483, 0210488, 0210489, 021048C                                                                                          |
|                                              |            | 021048F, 021048W, 0210493, 0210498, 0210499, 021049C, 021049F, 021049W, 02104A3, 02104A8, 02104A9, 02104AC, 02104AF, 02104AW, 02104J3, 02104J8, 02104J9, 02104JC, 02104JF, 02104JW, 02104K3, 02104K8, 02104K9, 02104KC, 02104KF, 02104KW, 02104Z3, 02104Z8, 02104Z9, 02104ZC, 02104ZF, 0211083, 0211088, 0211089, 021108C, 021108F, 021108W, 0211093, 0211098, 0211099, 021109C, 021109F, 021109W, 02110A3, 02110A8, 02110A9, 02110AC, 02110AF, 02110AW, 02110J3                                                                                          |
|                                              |            | 02110J8, 02110J9, 02110JC, 02110JF, 02110JW, 02110K3, 02110K8, 02110K9, 02110KC, 02110KF, 02110KW, 02110Z3, 02110Z8, 02110Z9, 02110ZC, 02110ZF, 0211483, 0211488, 0211489, 021148C, 021148F, 021148W, 0211493, 0211498, 0211499, 021149C, 021149F, 021149W, 02114A3, 02114A8, 02114A9, 02114AC, 02114AF, 02114AW, 02114J3, 02114J8, 02114J9, 02114JC, 02114JF, 02114JW, 02114K3, 02114K8, 02114K9, 02114KC, 02114KF, 02114KW, 02114Z3, 02114Z8, 02114Z9, 02114ZC                                                                                          |

| Comorbidity/Health Condition | Code Type | Codes                                                                                                                                                                                                                                                                                                                                                                                                                                                                                                                                                                                                                                                                                                                                                                                                                                                                                                                                                                                                                                                                       |
|------------------------------|-----------|-----------------------------------------------------------------------------------------------------------------------------------------------------------------------------------------------------------------------------------------------------------------------------------------------------------------------------------------------------------------------------------------------------------------------------------------------------------------------------------------------------------------------------------------------------------------------------------------------------------------------------------------------------------------------------------------------------------------------------------------------------------------------------------------------------------------------------------------------------------------------------------------------------------------------------------------------------------------------------------------------------------------------------------------------------------------------------|
|                              |           | 02114ZF, 0212083, 0212088, 0212089, 021208C, 021208F, 021208W, 0212093, 0212098, 0212099, 021209C, 021209F, 021209W, 02120A3, 02120A8, 02120A9, 02120AC, 02120AF, 02120AW, 02120J3, 02120J8, 02120J9, 02120JC, 02120JF, 02120JW, 02120K3, 02120K8, 02120K9, 02120KC, 02120KF, 02120KW, 02120Z3, 02120Z8, 02120Z9, 02120ZC, 02120ZF, 0212483, 0212488, 0212489, 021248C, 021248F, 021248W, 0212493, 0212498, 0212499, 021249C, 021249F, 021249W, 02124A3, 02124A8                                                                                                                                                                                                                                                                                                                                                                                                                                                                                                                                                                                                            |
|                              |           | 02124A9, 02124AC, 02124AF, 02124AW, 02124J3, 02124J8, 02124J9, 02124JC, 02124JF, 02124JW, 02124K3, 02124K8, 02124K9, 02124KC, 02124KF, 02124KW, 02124Z3, 02124Z8, 02124Z9, 02124ZC, 02124ZF, 0213083, 0213088, 0213089, 021308C, 021308F, 021308W, 0213093, 0213098, 0213099, 021309C, 021309F, 021309W, 02130A3, 02130A8, 02130A9, 02130AC, 02130AF, 02130AW, 02130J3, 02130J8, 02130J9, 02130JC, 02130JF, 02130JW, 02130K3, 02130K8, 02130K9, 02130KC, 02130KF                                                                                                                                                                                                                                                                                                                                                                                                                                                                                                                                                                                                            |
|                              |           | 02130KW, 02130Z3, 02130Z8, 02130Z9, 02130ZC, 02130ZF, 0213483, 0213488, 0213489, 021348C, 021348F, 021348W, 0213493, 0213498, 0213499, 021349C, 021349F, 021349W, 02134A3, 02134A8, 02134A9, 02134AC, 02134AF, 02134AW, 02134J3, 02134J8, 02134J9, 02134JC, 02134JF, 02134JW, 02134K3, 02134K8, 02134K9, 02134KC, 02134KF, 02134KW, 02134Z3, 02134Z8, 02134Z9, 02134ZC, 02134ZF, 021K0Z8, 021K0Z9, 021K0ZC, 021K0ZF, 021K0ZW, 021K4Z8, 021K4Z9, 021K4ZC, 021K4ZF                                                                                                                                                                                                                                                                                                                                                                                                                                                                                                                                                                                                            |
|                              |           | 021K4ZW, 021L08P, 021L08Q, 021L08R, 021L09P, 021L09Q, 021L09R, 021L0AP, 021L0AQ, 021L0AR, 021L0JP, 021L0JQ, 021L0JR, 021L0KP, 021L0KQ, 021L0KR, 021L0Z8, 021L0Z9, 021L0ZC, 021L0ZF, 021L0ZP, 021L0ZQ, 021L0ZR, 021L48P, 021L48Q, 021L48R, 021L49P, 021L49Q, 021L49R, 021L4AP, 021L4AQ, 021L4AR, 021L4JP, 021L4JQ, 021L4JR, 021L4KP, 021L4KQ, 021L4KR, 021L4Z8, 021L4Z9, 021L4ZC, 021L4ZF, 021L4ZP, 021L4ZQ, 021L4ZR                                                                                                                                                                                                                                                                                                                                                                                                                                                                                                                                                                                                                                                         |
| Coronary Artery Disease      | CPT-4     | 93452, 93453, 93454, 93455, 93456, 93457, 93458, 93459, 93460, 93461, 92973, 92974, 92977, 92980, 92981, 92982, 92984, 92995, 92996, 33510, 33511, 33512, 33513, 33514, 33516, 33517, 33518, 33519, 33520, 33521, 33522, 33523, 33525, 33528, 33530, 33533, 33534, 33535, 33536, 33560, 33572, 33575, 35600, 33570, 34701, 34702, 34703, 34704, 34705, 34706, 34707, 34708, 34709, 34710, 34711, 34717, 34718, 34841, 34842, 34843, 34844, 34845, 34846, 34847, 34848, 35450, 35452, 35454, 35456, 35458, 35459, 35460, 35470, 35471, 35472, 35473, 35474, 35475, 35476, 35879, 36902, 36903, 36905, 36906, 36907, 36908, 37215, 37216, 37217, 37218, 37220, 37221, 37222, 37223, 37224, 37225, 37226, 37227, 37228, 37229, 37230, 37231, 37232, 37233, 37234, 37235, 37236, 37237, 37238, 37239, 37246, 37247, 37248, 37249, 61630, 61635, 75962, 75963, 75964, 75965, 75966, 75967, 75968, 75969, 75970, 75972, 75973, 75974, 75975, 75976, 75977, 75978, 75979, 92920, 92921, 92924, 92925, 92928, 92929, 92933, 92934, 92937, 92938, 92941, 92943, 92944, 92997, 92998, |
| Coronary Artery Disease      | HCPCS     | G0290, G0291, S2205, S2206, S2207, S2208, S2209, C1034, C1100, C1101, C1366, C1367, C1500, C1725, C1885, C1930, C1933, C1948, C1981, C2605, C2623, C3551, C8526, C9600, C9601, C9602, C9603, C9604, C9605, C9606, C9607, C9608, C9754, G0392, G0393                                                                                                                                                                                                                                                                                                                                                                                                                                                                                                                                                                                                                                                                                                                                                                                                                         |
| Cystic Fibrosis              | ICD-10-CM | E84, E84.0, E84.1, E84.11, E84.19, E84.8, E84.9                                                                                                                                                                                                                                                                                                                                                                                                                                                                                                                                                                                                                                                                                                                                                                                                                                                                                                                                                                                                                             |
| Diabetes Mellitus            | ICD-10-CM | E08-E11, E13*                                                                                                                                                                                                                                                                                                                                                                                                                                                                                                                                                                                                                                                                                                                                                                                                                                                                                                                                                                                                                                                               |
| Drug Abuse Dependence        | ICD-10-CM | F11-F19, F55.*, O99.32*                                                                                                                                                                                                                                                                                                                                                                                                                                                                                                                                                                                                                                                                                                                                                                                                                                                                                                                                                                                                                                                     |
| HIV                          | ICD-10-CM | B20, Z21, B97.35, O98.7, O98.71, O98.711, O98.712, O98.713, O98.719, O98.72, O98.73                                                                                                                                                                                                                                                                                                                                                                                                                                                                                                                                                                                                                                                                                                                                                                                                                                                                                                                                                                                         |
| Hypertension                 | ICD-10-CM | I10-I13, I15-I16, I27.0, I27.2*, I87.3*, I97.3, N26.2                                                                                                                                                                                                                                                                                                                                                                                                                                                                                                                                                                                                                                                                                                                                                                                                                                                                                                                                                                                                                       |
| Interstitial Lung Disease    | ICD-10-CM | J84*                                                                                                                                                                                                                                                                                                                                                                                                                                                                                                                                                                                                                                                                                                                                                                                                                                                                                                                                                                                                                                                                        |
| Liver Disease                | ICD-10-CM | B18*, E83.01, E83.110, E88.01, I85*, I86.4, K65.2, K70-K76, K83.01, K91.83, Z94.4                                                                                                                                                                                                                                                                                                                                                                                                                                                                                                                                                                                                                                                                                                                                                                                                                                                                                                                                                                                           |
| Neurologic Conditions        | ICD-10-CM | D32*, D33.3, D36.11, F01, F01.5*, F02, F02.8*, F03, F03.9*, F10.27, F10.97, F13.27, F13.97, F18.17, F18.27, F18.97, F19.17, F19.27, F19.97, G10, G11.11, G12*, G20, G21, G21.1-G21.9, G23.1, G30*, G31.0, G31.09, G31.83, G32.0, G35, G40.0-G40.3, G40.4*, G40.8-G40.9, G40.B*, G45*, G60.0, G61.0, G64, G65.0, G70*, G71.0, G71.00, G71.01, G71.02, G71.09, G71.11, G71.12, G71.19, G71.2, G72.4, G72.41, G72.49, G72.9, G73.1, G80*, G91*, G95.0, H93.3, I60.7, I67.1, M33*, M48.0*, Q28, Q85.0*, S06.2*, S06.3*, Z13.850, Z82.0, Z87.820                                                                                                                                                                                                                                                                                                                                                                                                                                                                                                                                 |
| Obesity                      | ICD-10-CM | E66.*, K95.*, O99.210, O99.211, O99.212, O99.213, O99.214, O99.215, O99.840, O99.841, O99.842, O99.843, O99.844, O99.845, Z68.30, Z68.31, Z68.32, Z68.33, Z68.34, Z68.35, Z68.36, Z68.37, Z68.38, Z68.39, Z68.41, Z68.42, Z68.43, Z68.44, Z68.45                                                                                                                                                                                                                                                                                                                                                                                                                                                                                                                                                                                                                                                                                                                                                                                                                            |

| Comorbidity/Health Condition | Code Type  | Codes                                                                                                                                                                                                                                                                                                                                                                                                                                                                                                                                                                                                                                                                                                                                                                                                                                                                                                      |
|------------------------------|------------|------------------------------------------------------------------------------------------------------------------------------------------------------------------------------------------------------------------------------------------------------------------------------------------------------------------------------------------------------------------------------------------------------------------------------------------------------------------------------------------------------------------------------------------------------------------------------------------------------------------------------------------------------------------------------------------------------------------------------------------------------------------------------------------------------------------------------------------------------------------------------------------------------------|
| Obesity                      | ICD-10-PCS | 0D16079, 0D1607A, 0D1607B, 0D1607L, 0D160J9, 0D160JA, 0D160JB, 0D160JL, 0D160K9, 0D160KA, 0D160KB, 0D160KL, 0D160Z9, 0D160ZA, 0D160ZB, 0D160ZL, 0D16479, 0D1647A, 0D1647B, 0D1647L, 0D164J9, 0D164JA, 0D164JB, 0D164JL, 0D164K9, 0D164KA, 0D164KB, 0D164KL, 0D164Z9, 0D164ZA, 0D164ZB, 0D164ZL, 0D16879, 0D1687A, 0D1687B, 0D1687L, 0D168J9, 0D168JA, 0D168JB, 0D168JL, 0D168K9, 0D168KA, 0D168KB, 0D168KL, 0D168Z9, 0D168ZA, 0D168ZB, 0D168ZL, 0D19079, 0D1907A                                                                                                                                                                                                                                                                                                                                                                                                                                           |
|                              |            | 0D1907B, 0D190J9, 0D190JA, 0D190JB, 0D190K9, 0D190KA, 0D190KB, 0D190Z9, 0D190ZA, 0D190ZB, 0D19479, 0D1947A, 0D1947B, 0D194J9, 0D194JA, 0D194JB, 0D194K9, 0D194KA, 0D194KB, 0D194Z9, 0D194ZA, 0D194ZB, 0D19879, 0D1987A, 0D1987B, 0D198J9, 0D198JA, 0D198JB, 0D198K9, 0D198KA, 0D198KB, 0D198Z9, 0D198ZA, 0D198ZB, 0D1A07A, 0D1A07B, 0D1A0JA, 0D1A0JB, 0D1A0KA, 0D1A0KB, 0D1A0ZA, 0D1A0ZB, 0D1A47A, 0D1A47B, 0D1A4JA, 0D1A4JB, 0D1A4KA, 0D1A4KB, 0D1A4ZA, 0D1A4ZB                                                                                                                                                                                                                                                                                                                                                                                                                                           |
|                              |            | 0D1A87A, 0D1A87B, 0D1A8JA, 0D1A8JB, 0D1A8KA, 0D1A8KB, 0D1A8ZA, 0D1A8ZB, 0D1B07B, 0D1B0JB, 0D1B0KB, 0D1B0ZB, 0D1B47B, 0D1B4JB, 0D1B4KB, 0D1B4ZB, 0D1B87B, 0D1B8JB, 0D1B8KB, 0D1B8ZB, 0D1B8ZH, 0DB60Z3, 0DB60ZZ, 0DB63Z3, 0DB63ZZ, 0DB67Z3, 0DB67ZZ, 0DB68Z3, 0DB80ZZ, 0DBB0ZZ, 0DV64CZ, 0F190Z3, 0TRB07Z, 43645, 43644, 43770, 43842, 43843, 43847, 43846, 43845                                                                                                                                                                                                                                                                                                                                                                                                                                                                                                                                            |
| Pulmonary Conditions         | ICD-10-CM  | A22.1, A37.01, A37.11, A37.81, A37.91, A48.1, B25.0, B44.0, B77.81, J09.X1, J10.00, J10.01, J10.08, J11.00, J11.08, J12.*, J13, J14, J15.*, J16.0, J16.8, J17, J18.*, J69.0, J69.1, J69.8, J80, J95.4, J95.5, J95.851, J95.859, J95.88, J95.89, J96.*                                                                                                                                                                                                                                                                                                                                                                                                                                                                                                                                                                                                                                                      |
| Sickle Cell Disease          | ICD-10-CM  | D57.*                                                                                                                                                                                                                                                                                                                                                                                                                                                                                                                                                                                                                                                                                                                                                                                                                                                                                                      |
| Smoking                      | ICD-10-CM  | F17.21, F17.210, F17.211, F17.213, F17.218, F17.219, F17.29, F17.290, F17.291, F17.293, F17.298, F17.299, Z71.6, Z72.0, Z87.891                                                                                                                                                                                                                                                                                                                                                                                                                                                                                                                                                                                                                                                                                                                                                                            |
| Smoking                      | CPT-2      | 4001F, 4004F, 1034F                                                                                                                                                                                                                                                                                                                                                                                                                                                                                                                                                                                                                                                                                                                                                                                                                                                                                        |
| Smoking                      | CPT-4      | 99406, 99407                                                                                                                                                                                                                                                                                                                                                                                                                                                                                                                                                                                                                                                                                                                                                                                                                                                                                               |
| Smoking                      | HCPCS      | S4995, G9016, S9453, G0436, G9458, G9276                                                                                                                                                                                                                                                                                                                                                                                                                                                                                                                                                                                                                                                                                                                                                                                                                                                                   |
| Solid Organ Transplant       | ICD-10-PCS | 02Y, 02YA, 02YA0Z0, 02YA0Z1, 02YA0Z2, 07Y, 07YM, 07YM0Z0, 07YM0Z1, 07YM0Z2, 07YP, 07YP0Z0, 07YP0Z1, 07YP0Z2, 0BY, 0BYC, 0BYC0Z0, 0BYC0Z1, 0BYC0Z2, 0BYD, 0BYD0Z0, 0BYD0Z1, 0BYD0Z2, 0BYF, 0BYF0Z0, 0BYF0Z1, 0BYF0Z2, 0BYG, 0BYG0Z0, 0BYG0Z1, 0BYG0Z2, 0BYH, 0BYH0Z0, 0BYH0Z1, 0BYH0Z2, 0BYJ, 0BYJ0Z0, 0BYJ0Z1, 0BYJ0Z2, 0BYK, 0BYK0Z0, 0BYK0Z1, 0BYK0Z2, 0BYL, 0BYL0Z0, 0BYL0Z1, 0BYL0Z2, 0BYM, 0BYM0Z0, 0BYM0Z1, 0BYM0Z2, 0DY, 0DY5, 0DY50Z0, 0DY50Z1, 0DY50Z2, 0DY6, 0DY60Z0, 0DY60Z1, 0DY60Z2, 0DY8, 0DY80Z0, 0DY80Z1, 0DY80Z2, 0DYE, 0DYE0Z0, 0DYE0Z1, 0DYE0Z2, 0FY, 0FY0, 0FY00Z0, 0FY00Z1, 0FY00Z2, 0FYG, 0FYG0Z0, 0FYG0Z1, 0FYG0Z2, 0TY, 0TY0, 0TY00Z0, 0TY00Z1, 0TY00Z2, 0TY1, 0TY10Z0, 0TY10Z1, 0TY10Z2, 0UY, 0UY0, 0UY00Z0, 0UY00Z1, 0UY00Z2, 0UY1, 0UY10Z0, 0UY10Z1, 0UY10Z2, 0UY9, 0UY90Z0, 0UY90Z1, 0UY90Z2, 0WY, 0WY2, 0WY20Z0, 0WY20Z1, 0XY, 0XYJ, 0XYJ0Z0, 0XYJ0Z1, 0XYK, 0XYK0Z0, 0XYK0Z1 |
| Solid Organ Transplant       | CPT-3      | 0141T, 0142T, 0143T, 0584T, 0586T, 0585T                                                                                                                                                                                                                                                                                                                                                                                                                                                                                                                                                                                                                                                                                                                                                                                                                                                                   |
| Solid Organ Transplant       | CPT-4      | 23440, 29868, 32851, 32852, 32853, 32854, 33927, 33935, 33945, 43625, 44135, 44136, 47135, 47136, 48160, 48554, 50340, 50360, 50365, 50366, 50380, 60510, 60512, 65710, 65720, 65725, 65730, 65740, 65745, 65750, 65755, 65756, 65767, 65780, 65781, 65782, 76776, 76778, 81495, 81595, 0055U, 0087U, 0088U                                                                                                                                                                                                                                                                                                                                                                                                                                                                                                                                                                                                |
| Solid Organ Transplant       | HCPCS      | G0341, G0342, G0343, S2052, S2053, S2054, S2060, S2065, S2102, S2103, S2109, S2152                                                                                                                                                                                                                                                                                                                                                                                                                                                                                                                                                                                                                                                                                                                                                                                                                         |
| Vascular Disease             | ICD-10-CM  | I01*, I02.0, I05-I09, I10-I16, I20-I25, I26-I28, I30-I52, I70-I79, I80-I89, I95-I99                                                                                                                                                                                                                                                                                                                                                                                                                                                                                                                                                                                                                                                                                                                                                                                                                        |

Footnote:

Footnote: \* indicates a wildcard search for all indented codes within a parent prefix. For example, Z68.2\* represents all codes in the parent Z68.2 node such as Z68.20, Z68.21, Z68.22, Z68.23, Z68.24, Z68.25, Z68.26, Z68.27, Z68.28, Z68.29

## Additional File 2: Baseline Characteristics of Individuals with COVID-19 (PCR positive for SARS COV-2 or U07.1 diagnosis code in any setting) between April 1, 2020 to March 31, 2021 and with All SES Indicators Available in the Sentinel Distributed Database, Overall and by Race

|                             | Overall     |                            | Asian       |                            | Black or African American |                            | American Indian or Alaska Native |                            | Native Hawaiian or Other Pacific Islander |                            | White       |                            | Unknown Race |                            | Known Race (Asian or Black or African American or American Indian or Alaska Native or Native Hawaiian or Other Pacific Islander or White) |                            |
|-----------------------------|-------------|----------------------------|-------------|----------------------------|---------------------------|----------------------------|----------------------------------|----------------------------|-------------------------------------------|----------------------------|-------------|----------------------------|--------------|----------------------------|-------------------------------------------------------------------------------------------------------------------------------------------|----------------------------|
|                             | Number/Mean | Percent/Standard Deviation | Number/Mean | Percent/Standard Deviation | Number/Mean               | Percent/Standard Deviation | Number/Mean                      | Percent/Standard Deviation | Number/Mean                               | Percent/Standard Deviation | Number/Mean | Percent/Standard Deviation | Number/Mean  | Percent/Standard Deviation | Number/Mean                                                                                                                               | Percent/Standard Deviation |
| Patient Characteristics     |             |                            |             |                            |                           |                            |                                  |                            |                                           |                            |             |                            |              |                            |                                                                                                                                           |                            |
| Unique patients             | 770,924     | N/A                        | 14,519      | N/A                        | 76,638                    | N/A                        | 2,740                            | N/A                        | 4,163                                     | N/A                        | 356,084     | N/A                        | 316,780      | N/A                        | 454,144                                                                                                                                   | N/A                        |
| Demographic Characteristics |             |                            |             |                            |                           |                            |                                  |                            |                                           |                            |             |                            |              |                            |                                                                                                                                           |                            |
| Age (years)                 | 56.1        | 19.5                       | 49.3        | 15.3                       | 64.4                      | 14.0                       | 56.5                             | 15.3                       | 67.3                                      | 9.9                        | 64.3        | 15.4                       | 45.0         | 21.0                       | 63.8                                                                                                                                      | 15.2                       |
| Age                         |             |                            |             |                            |                           |                            |                                  |                            |                                           |                            |             |                            |              |                            |                                                                                                                                           |                            |
| 0-5 years                   | 6,786       | 0.9%                       | 108         | 0.7%                       | 78                        | 0.1%                       | 7                                | 0.3%                       | 3                                         | 0.1%                       | 800         | 0.2%                       | 5,790        | 1.8%                       | 996                                                                                                                                       | 0.2%                       |
| 6-11 years                  | 10,352      | 1.3%                       | 119         | 0.8%                       | 138                       | 0.2%                       | 12                               | 0.4%                       | 5                                         | 0.1%                       | 1,331       | 0.4%                       | 8,747        | 2.8%                       | 1,605                                                                                                                                     | 0.4%                       |
| 12-18 years                 | 26,823      | 3.5%                       | 286         | 2.0%                       | 402                       | 0.5%                       | 56                               | 2.0%                       | 18                                        | 0.4%                       | 4,629       | 1.3%                       | 21,432       | 6.8%                       | 5,391                                                                                                                                     | 1.2%                       |
| 19-29 years                 | 77,963      | 10.1%                      | 2,120       | 14.6%                      | 2,689                     | 3.5%                       | 240                              | 8.8%                       | 132                                       | 3.2%                       | 19,691      | 5.5%                       | 53,091       | 16.8%                      | 24,872                                                                                                                                    | 5.5%                       |
| 30-39 years                 | 77,074      | 10.0%                      | 2,883       | 19.9%                      | 4,676                     | 6.1%                       | 285                              | 10.4%                      | 153                                       | 3.7%                       | 22,419      | 6.3%                       | 46,658       | 14.7%                      | 30,416                                                                                                                                    | 6.7%                       |
| 40-49 years                 | 80,476      | 10.4%                      | 2,284       | 15.7%                      | 5,615                     | 7.3%                       | 365                              | 13.3%                      | 217                                       | 5.2%                       | 24,747      | 6.9%                       | 47,248       | 14.9%                      | 33,228                                                                                                                                    | 7.3%                       |

|                                           | Overall |       | Asian  |        | Black or African American |        | American Indian or Alaska Native |        | Native Hawaiian or Other Pacific Islander |        | White   |        | Unknown Race |        | Known Race (Asian or Black or African American or American Indian or Alaska Native or Native Hawaiian or Other Pacific Islander or White) |       |
|-------------------------------------------|---------|-------|--------|--------|---------------------------|--------|----------------------------------|--------|-------------------------------------------|--------|---------|--------|--------------|--------|-------------------------------------------------------------------------------------------------------------------------------------------|-------|
|                                           |         |       |        |        |                           |        |                                  |        |                                           |        |         |        |              |        |                                                                                                                                           |       |
| 50-64 years                               | 151,575 | 19.7% | 2,537  | 17.5%  | 16,183                    | 21.1%  | 682                              | 24.9%  | 522                                       | 12.5%  | 61,860  | 17.4%  | 69,791       | 22.0%  | 81,784                                                                                                                                    | 18.0% |
| 65-74 years                               | 185,123 | 24.0% | 2,775  | 19.1%  | 28,419                    | 37.1%  | 646                              | 23.6%  | 1,902                                     | 45.7%  | 113,143 | 31.8%  | 38,238       | 12.1%  | 146,885                                                                                                                                   | 32.3% |
| ≥ 75 years                                | 154,752 | 20.1% | 1,407  | 9.7%   | 18,438                    | 24.1%  | 447                              | 16.3%  | 1,211                                     | 29.1%  | 107,464 | 30.2%  | 25,785       | 8.1%   | 128,967                                                                                                                                   | 28.4% |
| Sex                                       |         |       |        |        |                           |        |                                  |        |                                           |        |         |        |              |        |                                                                                                                                           |       |
| Female                                    | 417,159 | 54.1% | 7,406  | 51.0%  | 46,573                    | 60.8%  | 1,587                            | 57.9%  | 1,955                                     | 47.0%  | 192,590 | 54.1%  | 167,048      | 52.7%  | 250,111                                                                                                                                   | 55.1% |
| Male                                      | 353,765 | 45.9% | 7,113  | 49.0%  | 30,065                    | 39.2%  | 1,153                            | 42.1%  | 2,208                                     | 53.0%  | 163,494 | 45.9%  | 149,732      | 47.3%  | 204,033                                                                                                                                   | 44.9% |
| Race                                      |         |       |        |        |                           |        |                                  |        |                                           |        |         |        |              |        |                                                                                                                                           |       |
| American Indian or Alaska Native          | 2,740   | 0.4%  | 0      | 0.0%   | 0                         | 0.0%   | 2,740                            | 100.0% | 0                                         | 0.0%   | 0       | 0.0%   | 0            | 0.0%   | 2,740                                                                                                                                     | 0.6%  |
| Asian                                     | 14,519  | 1.9%  | 14,519 | 100.0% | 0                         | 0.0%   | 0                                | 0.0%   | 0                                         | 0.0%   | 0       | 0.0%   | 0            | 0.0%   | 14,519                                                                                                                                    | 3.2%  |
| Black or African American                 | 76,638  | 9.9%  | 0      | 0.0%   | 76,638                    | 100.0% | 0                                | 0.0%   | 0                                         | 0.0%   | 0       | 0.0%   | 0            | 0.0%   | 76,638                                                                                                                                    | 16.9% |
| Native Hawaiian or Other Pacific Islander | 4,163   | 0.5%  | 0      | 0.0%   | 0                         | 0.0%   | 0                                | 0.0%   | 4,163                                     | 100.0% | 0       | 0.0%   | 0            | 0.0%   | 4,163                                                                                                                                     | 0.9%  |
| Unknown                                   | 316,780 | 41.1% | 0      | 0.0%   | 0                         | 0.0%   | 0                                | 0.0%   | 0                                         | 0.0%   | 0       | 0.0%   | 316,780      | 100.0% | 0                                                                                                                                         | 0.0%  |
| White                                     | 356,084 | 46.2% | 0      | 0.0%   | 0                         | 0.0%   | 0                                | 0.0%   | 0                                         | 0.0%   | 356,084 | 100.0% | 0            | 0.0%   | 356,084                                                                                                                                   | 78.4% |
| Hispanic origin                           |         |       |        |        |                           |        |                                  |        |                                           |        |         |        |              |        |                                                                                                                                           |       |
| Yes                                       | 48,004  | 6.2%  | 1,380  | 9.5%   | 793                       | 1.0%   | 671                              | 24.5%  | 134                                       | 3.2%   | 4,713   | 1.3%   | 40,313       | 12.7%  | 7,691                                                                                                                                     | 1.7%  |
| No                                        | 280,330 | 36.4% | 4,080  | 28.1%  | 52,464                    | 68.5%  | 1,330                            | 48.5%  | 3,590                                     | 86.2%  | 217,921 | 61.2%  | 945          | 0.3%   | 279,385                                                                                                                                   | 61.5% |

|                            | Overall |       | Asian |       | Black or African American |       | American Indian or Alaska Native |       | Native Hawaiian or Other Pacific Islander |       | White   |       | Unknown Race |       | Known Race (Asian or Black or African American or American Indian or Alaska Native or Native Hawaiian or Other Pacific Islander or White) |       |
|----------------------------|---------|-------|-------|-------|---------------------------|-------|----------------------------------|-------|-------------------------------------------|-------|---------|-------|--------------|-------|-------------------------------------------------------------------------------------------------------------------------------------------|-------|
|                            |         |       |       |       |                           |       |                                  |       |                                           |       |         |       |              |       |                                                                                                                                           |       |
| Unknown                    | 442,590 | 57.4% | 9,059 | 62.4% | 23,381                    | 30.5% | 739                              | 27.0% | 439                                       | 10.5% | 133,450 | 37.5% | 275,522      | 87.0% | 167,068                                                                                                                                   | 36.8% |
| Month-Year of Cohort Entry |         |       |       |       |                           |       |                                  |       |                                           |       |         |       |              |       |                                                                                                                                           |       |
| April 2020                 | 21,923  | 2.8%  | 610   | 4.2%  | 5,025                     | 6.6%  | 78                               | 2.8%  | 138                                       | 3.3%  | 8,796   | 2.5%  | 7,276        | 2.3%  | 14,647                                                                                                                                    | 3.2%  |
| May 2020                   | 18,459  | 2.4%  | 433   | 3.0%  | 2,713                     | 3.5%  | 55                               | 2.0%  | 105                                       | 2.5%  | 8,495   | 2.4%  | 6,658        | 2.1%  | 11,801                                                                                                                                    | 2.6%  |
| June 2020                  | 30,583  | 4.0%  | 619   | 4.3%  | 3,771                     | 4.9%  | 115                              | 4.2%  | 157                                       | 3.8%  | 12,091  | 3.4%  | 13,830       | 4.4%  | 16,753                                                                                                                                    | 3.7%  |
| July 2020                  | 63,350  | 8.2%  | 1,115 | 7.7%  | 8,780                     | 11.5% | 226                              | 8.2%  | 386                                       | 9.3%  | 24,472  | 6.9%  | 28,371       | 9.0%  | 34,979                                                                                                                                    | 7.7%  |
| August 2020                | 39,647  | 5.1%  | 710   | 4.9%  | 5,033                     | 6.6%  | 128                              | 4.7%  | 231                                       | 5.5%  | 17,154  | 4.8%  | 16,391       | 5.2%  | 23,256                                                                                                                                    | 5.1%  |
| September 2020             | 35,410  | 4.6%  | 560   | 3.9%  | 3,152                     | 4.1%  | 137                              | 5.0%  | 170                                       | 4.1%  | 16,569  | 4.7%  | 14,822       | 4.7%  | 20,588                                                                                                                                    | 4.5%  |
| October 2020               | 60,467  | 7.8%  | 875   | 6.0%  | 4,505                     | 5.9%  | 244                              | 8.9%  | 276                                       | 6.6%  | 30,037  | 8.4%  | 24,530       | 7.7%  | 35,937                                                                                                                                    | 7.9%  |
| November 2020              | 121,808 | 15.8% | 2,154 | 14.8% | 8,191                     | 10.7% | 461                              | 16.8% | 616                                       | 14.8% | 60,000  | 16.8% | 50,386       | 15.9% | 71,422                                                                                                                                    | 15.7% |
| December 2020              | 159,316 | 20.7% | 2,991 | 20.6% | 13,262                    | 17.3% | 576                              | 21.0% | 822                                       | 19.7% | 76,785  | 21.6% | 64,880       | 20.5% | 94,436                                                                                                                                    | 20.8% |
| January 2021               | 128,297 | 16.6% | 2,510 | 17.3% | 12,966                    | 16.9% | 471                              | 17.2% | 783                                       | 18.8% | 60,286  | 16.9% | 51,281       | 16.2% | 77,016                                                                                                                                    | 17.0% |
| February 2021              | 52,106  | 6.8%  | 1,095 | 7.5%  | 5,516                     | 7.2%  | 146                              | 5.3%  | 295                                       | 7.1%  | 23,873  | 6.7%  | 21,181       | 6.7%  | 30,925                                                                                                                                    | 6.8%  |
| March 2021                 | 39,558  | 5.1%  | 847   | 5.8%  | 3,724                     | 4.9%  | 103                              | 3.8%  | 184                                       | 4.4%  | 17,526  | 4.9%  | 17,174       | 5.4%  | 22,384                                                                                                                                    | 4.9%  |
| Census Bureau (CB) Region  |         |       |       |       |                           |       |                                  |       |                                           |       |         |       |              |       |                                                                                                                                           |       |
| Midwest                    | 143,876 | 18.7% | 1,436 | 9.9%  | 10,110                    | 13.2% | 258                              | 9.4%  | 705                                       | 16.9% | 73,490  | 20.6% | 57,877       | 18.3% | 85,999                                                                                                                                    | 18.9% |

|                                                       | Overall   |           | Asian     |           | Black or African American |           | American Indian or Alaska Native |           | Native Hawaiian or Other Pacific Islander |           | White     |           | Unknown Race |           | Known Race (Asian or Black or African American or American Indian or Alaska Native or Native Hawaiian or Other Pacific Islander or White) |           |
|-------------------------------------------------------|-----------|-----------|-----------|-----------|---------------------------|-----------|----------------------------------|-----------|-------------------------------------------|-----------|-----------|-----------|--------------|-----------|-------------------------------------------------------------------------------------------------------------------------------------------|-----------|
|                                                       |           |           |           |           |                           |           |                                  |           |                                           |           |           |           |              |           |                                                                                                                                           |           |
| Northeast                                             | 90,764    | 11.8%     | 2,340     | 16.1%     | 7,252                     | 9.5%      | 112                              | 4.1%      | 272                                       | 6.5%      | 34,919    | 9.8%      | 45,869       | 14.5%     | 44,895                                                                                                                                    | 9.9%      |
| South                                                 | 401,953   | 52.1%     | 5,003     | 34.5%     | 54,827                    | 71.5%     | 1,233                            | 45.0%     | 1,875                                     | 45.0%     | 186,929   | 52.5%     | 152,086      | 48.0%     | 249,867                                                                                                                                   | 55.0%     |
| West                                                  | 134,331   | 17.4%     | 5,740     | 39.5%     | 4,449                     | 5.8%      | 1,137                            | 41.5%     | 1,311                                     | 31.5%     | 60,746    | 17.1%     | 60,948       | 19.2%     | 73,383                                                                                                                                    | 16.2%     |
| CB Region (Invalid)                                   | 0         | 0.0%      | 0         | 0.0%      | 0                         | 0.0%      | 0                                | 0.0%      | 0                                         | 0.0%      | 0         | 0.0%      | 0            | 0.0%      | 0                                                                                                                                         | 0.0%      |
| CB Region (Missing)                                   | 0         | 0.0%      | 0         | 0.0%      | 0                         | 0.0%      | 0                                | 0.0%      | 0                                         | 0.0%      | 0         | 0.0%      | 0            | 0.0%      | 0                                                                                                                                         | 0.0%      |
| CB Region (Other)                                     | 0         | 0.0%      | 0         | 0.0%      | 0                         | 0.0%      | 0                                | 0.0%      | 0                                         | 0.0%      | 0         | 0.0%      | 0            | 0.0%      | 0                                                                                                                                         | 0.0%      |
| Urbanicity                                            |           |           |           |           |                           |           |                                  |           |                                           |           |           |           |              |           |                                                                                                                                           |           |
| Urban (population >= 50,000)                          | 529,595   | 68.7%     | 13,434    | 92.5%     | 56,679                    | 74.0%     | 1,585                            | 57.8%     | 3,300                                     | 79.3%     | 218,903   | 61.5%     | 235,694      | 74.4%     | 293,901                                                                                                                                   | 64.7%     |
| Suburban (population 2,500 - 49,999)                  | 7,537     | 1.0%      | 36        | 0.2%      | 955                       | 1.2%      | 24                               | 0.9%      | 22                                        | 0.5%      | 3,955     | 1.1%      | 2,545        | 0.8%      | 4,992                                                                                                                                     | 1.1%      |
| Rural (population < 2,500)                            | 233,785   | 30.3%     | 1,049     | 7.2%      | 19,003                    | 24.8%     | 1,131                            | 41.3%     | 841                                       | 20.2%     | 133,223   | 37.4%     | 78,538       | 24.8%     | 155,247                                                                                                                                   | 34.2%     |
| Zip Code Unknown or Urbanicity Not Available          | 7         | 0.0%      | 0         | 0.0%      | 1                         | 0.0%      | 0                                | 0.0%      | 0                                         | 0.0%      | 3         | 0.0%      | 3            | 0.0%      | 4                                                                                                                                         | 0.0%      |
| Proxies for Socioeconomic Status (SES)                |           |           |           |           |                           |           |                                  |           |                                           |           |           |           |              |           |                                                                                                                                           |           |
| Average Median Household Income <sup>2</sup>          | 68,019.2  | 26,550.0  | 83,700.0  | 31,115.5  | 53,534.1                  | 20,949.6  | 61,096.0                         | 22,499.9  | 67,312.3                                  | 25,110.5  | 67,827.0  | 24,719.7  | 71,090.0     | 28,484.2  | 65,877.1                                                                                                                                  | 24,886.1  |
| Average Median Home Value <sup>2</sup>                | 257,584.7 | 197,296.3 | 412,125.3 | 275,422.3 | 192,027.0                 | 134,508.0 | 222,156.8                        | 143,479.6 | 269,914.0                                 | 183,200.4 | 245,306.8 | 180,425.4 | 280,307.6    | 219,301.5 | 241,734.7                                                                                                                                 | 179,571.9 |
| Average Percent Unemployment <sup>2</sup>             | 5.3       | 2.7       | 4.8       | 1.9       | 7.3                       | 3.8       | 6.1                              | 3.5       | 5.5                                       | 2.6       | 5.0       | 2.4       | 5.1          | 2.5       | 5.4                                                                                                                                       | 2.8       |
| Missingness in Proxies for Socioeconomic Status (SES) |           |           |           |           |                           |           |                                  |           |                                           |           |           |           |              |           |                                                                                                                                           |           |
| Median Household Income Available                     | 770,924   | 100.0%    | 14,519    | 100.0%    | 76,638                    | 100.0%    | 2,740                            | 100.0%    | 4,163                                     | 100.0%    | 356,084   | 100.0%    | 316,780      | 100.0%    | 454,144                                                                                                                                   | 100.0%    |
| Median Home Value Available                           | 770,924   | 100.0%    | 14,519    | 100.0%    | 76,638                    | 100.0%    | 2,740                            | 100.0%    | 4,163                                     | 100.0%    | 356,084   | 100.0%    | 316,780      | 100.0%    | 454,144                                                                                                                                   | 100.0%    |

|                                                     | Overall |        | Asian  |        | Black or African American |        | American Indian or Alaska Native |        | Native Hawaiian or Other Pacific Islander |        | White   |        | Unknown Race |        | Known Race (Asian or Black or African American or American Indian or Alaska Native or Native Hawaiian or Other Pacific Islander or White) |        |
|-----------------------------------------------------|---------|--------|--------|--------|---------------------------|--------|----------------------------------|--------|-------------------------------------------|--------|---------|--------|--------------|--------|-------------------------------------------------------------------------------------------------------------------------------------------|--------|
|                                                     |         |        |        |        |                           |        |                                  |        |                                           |        |         |        |              |        |                                                                                                                                           |        |
| Percent Unemployment Available                      | 770,924 | 100.0% | 14,519 | 100.0% | 76,638                    | 100.0% | 2,740                            | 100.0% | 4,163                                     | 100.0% | 356,084 | 100.0% | 316,780      | 100.0% | 454,144                                                                                                                                   | 100.0% |
| All SES Indicators Available                        | 770,924 | 100.0% | 14,519 | 100.0% | 76,638                    | 100.0% | 2,740                            | 100.0% | 4,163                                     | 100.0% | 356,084 | 100.0% | 316,780      | 100.0% | 454,144                                                                                                                                   | 100.0% |
| Recorded History Of Prior to Index Event (-183, -1) |         |        |        |        |                           |        |                                  |        |                                           |        |         |        |              |        |                                                                                                                                           |        |
| Adult BMI 19.9 or less                              | 5,886   | 0.8%   | 130    | 0.9%   | 869                       | 1.1%   | 11                               | 0.4%   | 53                                        | 1.3%   | 3,441   | 1.0%   | 1,382        | 0.4%   | 4,504                                                                                                                                     | 1.0%   |
| Adult BMI 20-29                                     | 71,744  | 9.3%   | 1,316  | 9.1%   | 9,070                     | 11.8%  | 159                              | 5.8%   | 698                                       | 16.8%  | 39,394  | 11.1%  | 21,107       | 6.7%   | 50,637                                                                                                                                    | 11.1%  |
| Adult BMI 30-39                                     | 79,563  | 10.3%  | 603    | 4.2%   | 13,137                    | 17.1%  | 250                              | 9.1%   | 504                                       | 12.1%  | 41,701  | 11.7%  | 23,368       | 7.4%   | 56,195                                                                                                                                    | 12.4%  |
| Adult BMI 40 or greater                             | 33,395  | 4.3%   | 138    | 1.0%   | 7,083                     | 9.2%   | 132                              | 4.8%   | 144                                       | 3.5%   | 16,382  | 4.6%   | 9,516        | 3.0%   | 23,879                                                                                                                                    | 5.3%   |
| Alcohol or Drug Abuse                               | 18,895  | 2.5%   | 103    | 0.7%   | 2,977                     | 3.9%   | 103                              | 3.8%   | 113                                       | 2.7%   | 10,614  | 3.0%   | 4,985        | 1.6%   | 13,910                                                                                                                                    | 3.1%   |
| Alcohol Use Abuse                                   | 11,912  | 1.5%   | 74     | 0.5%   | 1,827                     | 2.4%   | 70                               | 2.6%   | 73                                        | 1.8%   | 6,720   | 1.9%   | 3,148        | 1.0%   | 8,764                                                                                                                                     | 1.9%   |
| Any Cancer                                          | 48,883  | 6.3%   | 496    | 3.4%   | 7,435                     | 9.7%   | 152                              | 5.5%   | 322                                       | 7.7%   | 29,311  | 8.2%   | 11,167       | 3.5%   | 37,716                                                                                                                                    | 8.3%   |
| Asthma                                              | 47,038  | 6.1%   | 646    | 4.4%   | 7,474                     | 9.8%   | 241                              | 8.8%   | 251                                       | 6.0%   | 23,075  | 6.5%   | 15,351       | 4.8%   | 31,687                                                                                                                                    | 7.0%   |
| Autoimmune Conditions                               | 21,481  | 2.8%   | 193    | 1.3%   | 3,975                     | 5.2%   | 101                              | 3.7%   | 153                                       | 3.7%   | 11,812  | 3.3%   | 5,247        | 1.7%   | 16,234                                                                                                                                    | 3.6%   |
| Blood Stem Cell Transplant                          | 54      | 0.0%   | 1      | 0.0%   | 7                         | 0.0%   | 0                                | 0.0%   | 1                                         | 0.0%   | 21      | 0.0%   | 24           | 0.0%   | 30                                                                                                                                        | 0.0%   |
| Chronic Kidney Disease                              | 107,424 | 13.9%  | 1,242  | 8.6%   | 20,476                    | 26.7%  | 383                              | 14.0%  | 964                                       | 23.2%  | 63,483  | 17.8%  | 20,876       | 6.6%   | 86,548                                                                                                                                    | 19.1%  |
| Congestive Heart Failure                            | 62,730  | 8.1%   | 434    | 3.0%   | 12,576                    | 16.4%  | 175                              | 6.4%   | 440                                       | 10.6%  | 38,394  | 10.8%  | 10,711       | 3.4%   | 52,019                                                                                                                                    | 11.5%  |
| Chronic Obstructive Pulmonary Disease (COPD)        | 75,921  | 9.8%   | 492    | 3.4%   | 11,291                    | 14.7%  | 263                              | 9.6%   | 426                                       | 10.2%  | 49,928  | 14.0%  | 13,521       | 4.3%   | 62,400                                                                                                                                    | 13.7%  |

|                                                 | Overall |       | Asian |       | Black or African American |       | American Indian or Alaska Native |       | Native Hawaiian or Other Pacific Islander |       | White   |       | Unknown Race |       | Known Race (Asian or Black or African American or American Indian or Alaska Native or Native Hawaiian or Other Pacific Islander or White) |       |
|-------------------------------------------------|---------|-------|-------|-------|---------------------------|-------|----------------------------------|-------|-------------------------------------------|-------|---------|-------|--------------|-------|-------------------------------------------------------------------------------------------------------------------------------------------|-------|
|                                                 |         |       |       |       |                           |       |                                  |       |                                           |       |         |       |              |       |                                                                                                                                           |       |
| Coronary Artery Disease                         | 121,447 | 15.8% | 1,203 | 8.3%  | 18,197                    | 23.7% | 389                              | 14.2% | 1,000                                     | 24.0% | 77,402  | 21.7% | 23,256       | 7.3%  | 98,191                                                                                                                                    | 21.6% |
| Cystic Fibrosis                                 | 101     | 0.0%  | 1     | 0.0%  | 7                         | 0.0%  | 0                                | 0.0%  | 0                                         | 0.0%  | 56      | 0.0%  | 37           | 0.0%  | 64                                                                                                                                        | 0.0%  |
| Diabetes Mellitus                               | 174,771 | 22.7% | 2,855 | 19.7% | 32,436                    | 42.3% | 817                              | 29.8% | 1,730                                     | 41.6% | 93,529  | 26.3% | 43,404       | 13.7% | 131,367                                                                                                                                   | 28.9% |
| Drug Abuse Dependence                           | 8,664   | 1.1%  | 42    | 0.3%  | 1,466                     | 1.9%  | 46                               | 1.7%  | 46                                        | 1.1%  | 4,751   | 1.3%  | 2,313        | 0.7%  | 6,351                                                                                                                                     | 1.4%  |
| HIV                                             | 2,432   | 0.3%  | 30    | 0.2%  | 801                       | 1.0%  | 16                               | 0.6%  | 10                                        | 0.2%  | 759     | 0.2%  | 816          | 0.3%  | 1,616                                                                                                                                     | 0.4%  |
| Hypertension                                    | 337,780 | 43.8% | 4,355 | 30.0% | 54,686                    | 71.4% | 1,205                            | 44.0% | 2,582                                     | 62.0% | 192,572 | 54.1% | 82,380       | 26.0% | 255,400                                                                                                                                   | 56.2% |
| Interstitial Lung Disease                       | 8,957   | 1.2%  | 96    | 0.7%  | 1,249                     | 1.6%  | 29                               | 1.1%  | 75                                        | 1.8%  | 5,736   | 1.6%  | 1,772        | 0.6%  | 7,185                                                                                                                                     | 1.6%  |
| Liver Disease                                   | 31,122  | 4.0%  | 534   | 3.7%  | 3,900                     | 5.1%  | 148                              | 5.4%  | 273                                       | 6.6%  | 17,021  | 4.8%  | 9,246        | 2.9%  | 21,876                                                                                                                                    | 4.8%  |
| Neurologic Conditions                           | 86,150  | 11.2% | 602   | 4.1%  | 12,346                    | 16.1% | 294                              | 10.7% | 533                                       | 12.8% | 55,092  | 15.5% | 17,283       | 5.5%  | 68,867                                                                                                                                    | 15.2% |
| Obesity                                         | 150,806 | 19.6% | 1,102 | 7.6%  | 26,135                    | 34.1% | 556                              | 20.3% | 848                                       | 20.4% | 76,839  | 21.6% | 45,326       | 14.3% | 105,480                                                                                                                                   | 23.2% |
| Pulmonary Conditions                            | 43,084  | 5.6%  | 455   | 3.1%  | 7,143                     | 9.3%  | 181                              | 6.6%  | 315                                       | 7.6%  | 25,804  | 7.2%  | 9,186        | 2.9%  | 33,898                                                                                                                                    | 7.5%  |
| Sickle Cell Disease                             | 795     | 0.1%  | 5     | 0.0%  | 532                       | 0.7%  | 1                                | 0.0%  | 4                                         | 0.1%  | 40      | 0.0%  | 213          | 0.1%  | 582                                                                                                                                       | 0.1%  |
| Smoking                                         | 92,818  | 12.0% | 634   | 4.4%  | 14,083                    | 18.4% | 370                              | 13.5% | 591                                       | 14.2% | 57,426  | 16.1% | 19,714       | 6.2%  | 73,104                                                                                                                                    | 16.1% |
| Solid Organ or Stem Cell Transplant             | 596     | 0.1%  | 15    | 0.1%  | 117                       | 0.2%  | 0                                | 0.0%  | 6                                         | 0.1%  | 279     | 0.1%  | 179          | 0.1%  | 417                                                                                                                                       | 0.1%  |
| Solid Organ Transplant                          | 542     | 0.1%  | 14    | 0.1%  | 110                       | 0.1%  | 0                                | 0.0%  | 5                                         | 0.1%  | 258     | 0.1%  | 155          | 0.0%  | 387                                                                                                                                       | 0.1%  |
| Vascular Disease                                | 374,655 | 48.6% | 4,792 | 33.0% | 57,179                    | 74.6% | 1,311                            | 47.8% | 2,803                                     | 67.3% | 214,607 | 60.3% | 93,963       | 29.7% | 280,692                                                                                                                                   | 61.8% |
| Recorded Use Of Prior to Index Event (-183, -1) |         |       |       |       |                           |       |                                  |       |                                           |       |         |       |              |       |                                                                                                                                           |       |
| Chemotherapy                                    | 11,694  | 1.5%  | 144   | 1.0%  | 1,865                     | 2.4%  | 46                               | 1.7%  | 83                                        | 2.0%  | 6,639   | 1.9%  | 2,917        | 0.9%  | 8,777                                                                                                                                     | 1.9%  |

|                                                 | Overall |       | Asian |       | Black or African American |       | American Indian or Alaska Native |       | Native Hawaiian or Other Pacific Islander |       | White  |       | Unknown Race |       | Known Race (Asian or Black or African American or American Indian or Alaska Native or Native Hawaiian or Other Pacific Islander or White) |       |
|-------------------------------------------------|---------|-------|-------|-------|---------------------------|-------|----------------------------------|-------|-------------------------------------------|-------|--------|-------|--------------|-------|-------------------------------------------------------------------------------------------------------------------------------------------|-------|
|                                                 |         |       |       |       |                           |       |                                  |       |                                           |       |        |       |              |       |                                                                                                                                           |       |
| Glucocorticoids Inhaled                         | 43,597  | 5.7%  | 504   | 3.5%  | 5,929                     | 7.7%  | 167                              | 6.1%  | 193                                       | 4.6%  | 25,024 | 7.0%  | 11,780       | 3.7%  | 31,817                                                                                                                                    | 7.0%  |
| Glucocorticoids NonSystemic                     | 91,594  | 11.9% | 1,504 | 10.4% | 11,866                    | 15.5% | 336                              | 12.3% | 586                                       | 14.1% | 49,613 | 13.9% | 27,689       | 8.7%  | 63,905                                                                                                                                    | 14.1% |
| Glucocorticoids Ophthalmic                      | 9,848   | 1.3%  | 165   | 1.1%  | 1,535                     | 2.0%  | 38                               | 1.4%  | 94                                        | 2.3%  | 5,441  | 1.5%  | 2,575        | 0.8%  | 7,273                                                                                                                                     | 1.6%  |
| Glucocorticoids Systemic                        | 181,417 | 23.5% | 2,044 | 14.1% | 22,356                    | 29.2% | 699                              | 25.5% | 939                                       | 22.6% | 99,264 | 27.9% | 56,115       | 17.7% | 125,302                                                                                                                                   | 27.6% |
| Glucocorticoids Topical                         | 44,155  | 5.7%  | 918   | 6.3%  | 5,366                     | 7.0%  | 155                              | 5.7%  | 344                                       | 8.3%  | 22,694 | 6.4%  | 14,678       | 4.6%  | 29,477                                                                                                                                    | 6.5%  |
| Immune Modulators                               | 21,788  | 2.8%  | 301   | 2.1%  | 2,988                     | 3.9%  | 73                               | 2.7%  | 151                                       | 3.6%  | 12,383 | 3.5%  | 5,892        | 1.9%  | 15,896                                                                                                                                    | 3.5%  |
| Immunosuppressants                              | 12,715  | 1.6%  | 159   | 1.1%  | 2,126                     | 2.8%  | 64                               | 2.3%  | 95                                        | 2.3%  | 6,821  | 1.9%  | 3,450        | 1.1%  | 9,265                                                                                                                                     | 2.0%  |
| Recent Use Of Certain Treatments (-30, 0)       |         |       |       |       |                           |       |                                  |       |                                           |       |        |       |              |       |                                                                                                                                           |       |
| Angiotensin-converting enzyme (ACE) inhibitors  | 49,578  | 6.4%  | 596   | 4.1%  | 6,118                     | 8.0%  | 232                              | 8.5%  | 348                                       | 8.4%  | 27,780 | 7.8%  | 14,504       | 4.6%  | 35,074                                                                                                                                    | 7.7%  |
| Angiotensin receptor blockers (ARBs)            | 44,630  | 5.8%  | 877   | 6.0%  | 7,405                     | 9.7%  | 183                              | 6.7%  | 344                                       | 8.3%  | 23,174 | 6.5%  | 12,647       | 4.0%  | 31,983                                                                                                                                    | 7.0%  |
| Vasopressors                                    | 2,235   | 0.3%  | 35    | 0.2%  | 418                       | 0.5%  | 3                                | 0.1%  | 23                                        | 0.6%  | 1,258  | 0.4%  | 498          | 0.2%  | 1,737                                                                                                                                     | 0.4%  |
| Comorbidity Burden (-183,-1)                    |         |       |       |       |                           |       |                                  |       |                                           |       |        |       |              |       |                                                                                                                                           |       |
| Charlson/Elixhauser combined comorbidity score3 | 1.2     | 2.4   | 0.6   | 1.6   | 2.1                       | 3.0   | 1.2                              | 2.3   | 1.7                                       | 2.7   | 1.6    | 2.6   | 0.6          | 1.7   | 1.7                                                                                                                                       | 2.7   |
| Symptoms at Diagnosis (-1, 14)                  |         |       |       |       |                           |       |                                  |       |                                           |       |        |       |              |       |                                                                                                                                           |       |
| Cough                                           | 160,591 | 20.8% | 2,825 | 19.5% | 17,476                    | 22.8% | 547                              | 20.0% | 956                                       | 23.0% | 77,858 | 21.9% | 60,929       | 19.2% | 99,662                                                                                                                                    | 21.9% |
| Diarrhea                                        | 31,347  | 4.1%  | 386   | 2.7%  | 4,264                     | 5.6%  | 125                              | 4.6%  | 187                                       | 4.5%  | 17,323 | 4.9%  | 9,062        | 2.9%  | 22,285                                                                                                                                    | 4.9%  |
| Dyspnea/Short of Breath                         | 162,847 | 21.1% | 2,503 | 17.2% | 24,793                    | 32.4% | 696                              | 25.4% | 1,214                                     | 29.2% | 88,973 | 25.0% | 44,668       | 14.1% | 118,179                                                                                                                                   | 26.0% |

|                                                   | Overall |       | Asian |       | Black or African American |       | American Indian or Alaska Native |       | Native Hawaiian or Other Pacific Islander |       | White  |       | Unknown Race |       | Known Race (Asian or Black or African American or American Indian or Alaska Native or Native Hawaiian or Other Pacific Islander or White) |       |
|---------------------------------------------------|---------|-------|-------|-------|---------------------------|-------|----------------------------------|-------|-------------------------------------------|-------|--------|-------|--------------|-------|-------------------------------------------------------------------------------------------------------------------------------------------|-------|
|                                                   |         |       |       |       |                           |       |                                  |       |                                           |       |        |       |              |       |                                                                                                                                           |       |
| Fever                                             | 94,747  | 12.3% | 1,885 | 13.0% | 11,766                    | 15.4% | 324                              | 11.8% | 585                                       | 14.1% | 44,388 | 12.5% | 35,799       | 11.3% | 58,948                                                                                                                                    | 13.0% |
| Headache                                          | 9,208   | 1.2%  | 154   | 1.1%  | 1,153                     | 1.5%  | 39                               | 1.4%  | 54                                        | 1.3%  | 3,436  | 1.0%  | 4,372        | 1.4%  | 4,836                                                                                                                                     | 1.1%  |
| Malaise or Fatigue                                | 99,622  | 12.9% | 1,320 | 9.1%  | 14,033                    | 18.3% | 320                              | 11.7% | 647                                       | 15.5% | 55,895 | 15.7% | 27,407       | 8.7%  | 72,215                                                                                                                                    | 15.9% |
| Multisystem Inflammatory Syndrome                 | 99      | 0.0%  | 0     | 0.0%  | 17                        | 0.0%  | 0                                | 0.0%  | 0                                         | 0.0%  | 41     | 0.0%  | 41           | 0.0%  | 58                                                                                                                                        | 0.0%  |
| Myalgia                                           | 20,229  | 2.6%  | 413   | 2.8%  | 1,912                     | 2.5%  | 81                               | 3.0%  | 101                                       | 2.4%  | 8,641  | 2.4%  | 9,081        | 2.9%  | 11,148                                                                                                                                    | 2.5%  |
| Nasal Congestion                                  | 19,750  | 2.6%  | 204   | 1.4%  | 1,316                     | 1.7%  | 60                               | 2.2%  | 51                                        | 1.2%  | 8,569  | 2.4%  | 9,550        | 3.0%  | 10,200                                                                                                                                    | 2.2%  |
| Nausea or Vomiting                                | 35,972  | 4.7%  | 384   | 2.6%  | 4,851                     | 6.3%  | 153                              | 5.6%  | 221                                       | 5.3%  | 19,391 | 5.4%  | 10,972       | 3.5%  | 25,000                                                                                                                                    | 5.5%  |
| Smell or Taste Disturbance                        | 16,365  | 2.1%  | 230   | 1.6%  | 1,402                     | 1.8%  | 55                               | 2.0%  | 61                                        | 1.5%  | 6,062  | 1.7%  | 8,555        | 2.7%  | 7,810                                                                                                                                     | 1.7%  |
| Sore Throat                                       | 27,398  | 3.6%  | 498   | 3.4%  | 1,476                     | 1.9%  | 83                               | 3.0%  | 126                                       | 3.0%  | 10,518 | 3.0%  | 14,697       | 4.6%  | 12,701                                                                                                                                    | 2.8%  |
| Health Service Utilization Intensity (-183,-1)    |         |       |       |       |                           |       |                                  |       |                                           |       |        |       |              |       |                                                                                                                                           |       |
| Mean number of ambulatory encounters              | 8.6     | 11.8  | 6.1   | 9.5   | 11.2                      | 15.5  | 7.9                              | 11.1  | 9.7                                       | 13.1  | 10.0   | 12.0  | 6.4          | 10.1  | 10.1                                                                                                                                      | 12.6  |
| Mean number of emergency room encounters          | 0.5     | 1.7   | 0.2   | 1.2   | 0.9                       | 2.5   | 0.7                              | 2.0   | 0.5                                       | 1.4   | 0.6    | 1.8   | 0.3          | 1.2   | 0.6                                                                                                                                       | 1.9   |
| Mean number of inpatient hospital encounters      | 0.1     | 0.4   | 0.0   | 0.3   | 0.2                       | 0.6   | 0.1                              | 0.5   | 0.1                                       | 0.5   | 0.1    | 0.5   | 0.1          | 0.3   | 0.1                                                                                                                                       | 0.5   |
| Mean number of non-acute institutional encounters | 0.0     | 0.3   | 0.0   | 0.1   | 0.1                       | 0.3   | 0.0                              | 0.3   | 0.0                                       | 0.3   | 0.1    | 0.3   | 0.0          | 0.2   | 0.1                                                                                                                                       | 0.3   |
| Mean number of other ambulatory encounters        | 1.6     | 5.8   | 0.9   | 4.0   | 2.4                       | 7.7   | 2.1                              | 5.9   | 1.7                                       | 5.8   | 2.2    | 6.7   | 0.8          | 3.6   | 2.2                                                                                                                                       | 6.8   |
| Mean number of filled prescriptions               | 12.6    | 16.3  | 7.3   | 10.0  | 17.2                      | 17.6  | 13.9                             | 17.3  | 13.8                                      | 14.2  | 15.6   | 18.0  | 8.3          | 13.1  | 15.6                                                                                                                                      | 17.8  |
| Mean number of generics dispensed                 | 5.4     | 5.1   | 3.6   | 3.7   | 7.6                       | 5.5   | 5.6                              | 5.3   | 6.5                                       | 4.8   | 6.5    | 5.4   | 3.7          | 4.4   | 6.6                                                                                                                                       | 5.4   |

|                                              | Overall |     | Asian |     | Black or African American |     | American Indian or Alaska Native |     | Native Hawaiian or Other Pacific Islander |     | White |     | Unknown Race |     | Known Race (Asian or Black or African American or American Indian or Alaska Native or Native Hawaiian or Other Pacific Islander or White) |     |
|----------------------------------------------|---------|-----|-------|-----|---------------------------|-----|----------------------------------|-----|-------------------------------------------|-----|-------|-----|--------------|-----|-------------------------------------------------------------------------------------------------------------------------------------------|-----|
|                                              |         |     |       |     |                           |     |                                  |     |                                           |     |       |     |              |     |                                                                                                                                           |     |
| Mean number of unique drug classes dispensed | 5.1     | 4.7 | 3.3   | 3.4 | 7.1                       | 5.0 | 5.2                              | 4.9 | 6.1                                       | 4.4 | 6.2   | 4.9 | 3.5          | 4.0 | 6.2                                                                                                                                       | 4.9 |

Footnotes: 1Value represents standard deviation where no % follows the value. 2These variables were calculated only among those with a known SES information. 3The Charlson/Elixhauser Combined Comorbidity Score is calculated based on comorbidities observed during a requester-defined window around the exposure episode start date. (Gagne JJ, Glynn RJ, Avorn J, Levin R, Schneeweiss S. A combined comorbidity score predicted mortality in elderly patients better than existing scores. J Clin Epidemiol. 2011;64(7):749-759) N/A: Not Applicable

# Additional File 3: Baseline Characteristics of Individuals with COVID-19 (PCR positive for SARS COV-2 or U07.1 diagnosis code in any setting) between April 1, 2020 to March 31, 2021 in the Sentinel Distributed Database, Overall and by COVID Hospitalization Outcome Status

| Patient Characteristics                   | Overall     |                                 | Evidence of outcome |                                 | No evidence of outcome |                                 |
|-------------------------------------------|-------------|---------------------------------|---------------------|---------------------------------|------------------------|---------------------------------|
|                                           | Number/Mean | Percent/<br>Standard Deviation1 | Number/Mean         | Percent/<br>Standard Deviation1 | Number/Mean            | Percent/<br>Standard Deviation1 |
| Unique patients                           | 841,628     | N/A                             | 129,802             | N/A                             | 711,826                | N/A                             |
| Demographic Characteristics               |             |                                 |                     |                                 |                        |                                 |
| Age (years)                               | 55.2        | 19.7                            | 71.6                | 13.1                            | 52.2                   | 19.7                            |
| Age                                       |             |                                 |                     |                                 |                        |                                 |
| 0-5 years                                 | 8,231       | 1.0%                            | 72                  | 0.1%                            | 8,159                  | 1.1%                            |
| 6-11 years                                | 12,438      | 1.5%                            | 40                  | 0.0%                            | 12,398                 | 1.7%                            |
| 12-18 years                               | 31,580      | 3.8%                            | 165                 | 0.1%                            | 31,415                 | 4.4%                            |
| 19-29 years                               | 89,419      | 10.6%                           | 1,178               | 0.9%                            | 88,241                 | 12.4%                           |
| 30-39 years                               | 86,781      | 10.3%                           | 2,586               | 2.0%                            | 84,195                 | 11.8%                           |
| 40-49 years                               | 90,333      | 10.7%                           | 4,845               | 3.7%                            | 85,488                 | 12.0%                           |
| 50-64 years                               | 168,258     | 20.0%                           | 21,298              | 16.4%                           | 146,960                | 20.6%                           |
| 65-74 years                               | 193,277     | 23.0%                           | 43,725              | 33.7%                           | 149,552                | 21.0%                           |
| ≥ 75 years                                | 161,311     | 19.2%                           | 55,893              | 43.1%                           | 105,418                | 14.8%                           |
| Sex                                       |             |                                 |                     |                                 |                        |                                 |
| Female                                    | 454,938     | 54.1%                           | 62,673              | 48.3%                           | 392,265                | 55.1%                           |
| Male                                      | 386,690     | 45.9%                           | 67,129              | 51.7%                           | 319,561                | 44.9%                           |
| Race                                      |             |                                 |                     |                                 |                        |                                 |
| American Indian or Alaska Native          | 2,853       | 0.3%                            | 533                 | 0.4%                            | 2,320                  | 0.3%                            |
| Asian                                     | 16,783      | 2.0%                            | 1,923               | 1.5%                            | 14,860                 | 2.1%                            |
| Black or African American                 | 80,325      | 9.5%                            | 23,007              | 17.7%                           | 57,318                 | 8.1%                            |
| Native Hawaiian or Other Pacific Islander | 4,353       | 0.5%                            | 1,154               | 0.9%                            | 3,199                  | 0.4%                            |
| Unknown                                   | 354,640     | 42.1%                           | 30,398              | 23.4%                           | 324,242                | 45.6%                           |
| White                                     | 382,674     | 45.5%                           | 72,787              | 56.1%                           | 309,887                | 43.5%                           |
| Hispanic origin                           |             |                                 |                     |                                 |                        |                                 |

|                                              | Overall  |          | Evidence of outcome |          | No evidence of outcome |          |
|----------------------------------------------|----------|----------|---------------------|----------|------------------------|----------|
| Yes                                          | 52,568   | 6.2%     | 5,569               | 4.3%     | 46,999                 | 6.6%     |
| No                                           | 283,161  | 33.6%    | 76,659              | 59.1%    | 206,502                | 29.0%    |
| Unknown                                      | 505,899  | 60.1%    | 47,574              | 36.7%    | 458,325                | 64.4%    |
| Month-Year of Cohort Entry                   |          |          |                     |          |                        |          |
| April 2020                                   | 27,111   | 3.2%     | 7,267               | 5.6%     | 19,844                 | 2.8%     |
| May 2020                                     | 22,097   | 2.6%     | 3,426               | 2.6%     | 18,671                 | 2.6%     |
| June 2020                                    | 32,987   | 3.9%     | 4,243               | 3.3%     | 28,744                 | 4.0%     |
| July 2020                                    | 66,695   | 7.9%     | 10,684              | 8.2%     | 56,011                 | 7.9%     |
| August 2020                                  | 43,119   | 5.1%     | 6,738               | 5.2%     | 36,381                 | 5.1%     |
| September 2020                               | 38,451   | 4.6%     | 5,285               | 4.1%     | 33,166                 | 4.7%     |
| October 2020                                 | 65,215   | 7.7%     | 9,738               | 7.5%     | 55,477                 | 7.8%     |
| November 2020                                | 131,906  | 15.7%    | 20,458              | 15.8%    | 111,448                | 15.7%    |
| December 2020                                | 171,908  | 20.4%    | 26,620              | 20.5%    | 145,288                | 20.4%    |
| January 2021                                 | 138,781  | 16.5%    | 21,015              | 16.2%    | 117,766                | 16.5%    |
| February 2021                                | 57,294   | 6.8%     | 8,538               | 6.6%     | 48,756                 | 6.8%     |
| March 2021                                   | 46,064   | 5.5%     | 5,790               | 4.5%     | 40,274                 | 5.7%     |
| Census Bureau (CB) Region                    |          |          |                     |          |                        |          |
| Midwest                                      | 144,132  | 17.1%    | 27,709              | 21.3%    | 116,423                | 16.4%    |
| Northeast                                    | 157,687  | 18.7%    | 16,283              | 12.5%    | 141,404                | 19.9%    |
| South                                        | 403,464  | 47.9%    | 70,443              | 54.3%    | 333,021                | 46.8%    |
| West                                         | 134,564  | 16.0%    | 15,159              | 11.7%    | 119,405                | 16.8%    |
| CB Region (Invalid)                          | 561      | 0.1%     | 62                  | 0.0%     | 499                    | 0.1%     |
| CB Region (Missing)                          | 675      | 0.1%     | 43                  | 0.0%     | 632                    | 0.1%     |
| CB Region (Other)                            | 545      | 0.1%     | 103                 | 0.1%     | 442                    | 0.1%     |
| Urbanicity                                   |          |          |                     |          |                        |          |
| Urban (population >= 50,000)                 | 590,496  | 70.2%    | 83,349              | 64.2%    | 507,147                | 71.2%    |
| Suburban (population 2,500 - 49,999)         | 8,156    | 1.0%     | 1,551               | 1.2%     | 6,605                  | 0.9%     |
| Rural (population < 2,500)                   | 241,194  | 28.7%    | 44,692              | 34.4%    | 196,502                | 27.6%    |
| Zip Code Unknown or Urbanicity Not Available | 1,782    | 0.2%     | 210                 | 0.2%     | 1,572                  | 0.2%     |
| Proxies for Socioeconomic Status (SES)       |          |          |                     |          |                        |          |
| Average Median Household Income2             | 68,000.1 | 26,556.9 | 59,577.3            | 21,749.3 | 69,621.8               | 27,243.1 |

|                                                       | Overall   |           | Evidence of outcome |           | No evidence of outcome |           |
|-------------------------------------------------------|-----------|-----------|---------------------|-----------|------------------------|-----------|
| Average Median Home Value <sup>2</sup>                | 257,527.4 | 197,349.8 | 199,388.5           | 130,960.7 | 268,720.9              | 206,703.1 |
| Average Percent Unemployment <sup>2</sup>             | 5.3       | 2.7       | 5.9                 | 3.2       | 5.2                    | 2.7       |
| Missingness in Proxies for Socioeconomic Status (SES) |           |           |                     |           |                        |           |
| Median Household Income Available                     | 771,807   | 91.7%     | 124,636             | 96.0%     | 647,171                | 90.9%     |
| Median Home Value Available                           | 771,570   | 91.7%     | 124,576             | 96.0%     | 646,994                | 90.9%     |
| Percent Unemployment Available                        | 772,942   | 91.8%     | 124,852             | 96.2%     | 648,090                | 91.0%     |
| All SES Indicators Available                          | 770,924   | 91.6%     | 124,455             | 95.9%     | 646,469                | 90.8%     |
| Recorded History Of Prior to Index Event (-183, -1)   |           |           |                     |           |                        |           |
| Adult BMI 19.9 or less                                | 6,271     | 0.7%      | 1,799               | 1.4%      | 4,472                  | 0.6%      |
| Adult BMI 20-29                                       | 76,667    | 9.1%      | 16,208              | 12.5%     | 60,459                 | 8.5%      |
| Adult BMI 30-39                                       | 83,949    | 10.0%     | 20,299              | 15.6%     | 63,650                 | 8.9%      |
| Adult BMI 40 or greater                               | 34,973    | 4.2%      | 10,010              | 7.7%      | 24,963                 | 3.5%      |
| Alcohol or Drug Abuse                                 | 20,122    | 2.4%      | 5,332               | 4.1%      | 14,790                 | 2.1%      |
| Alcohol Use Abuse                                     | 12,763    | 1.5%      | 3,378               | 2.6%      | 9,385                  | 1.3%      |
| Any Cancer                                            | 51,856    | 6.2%      | 15,726              | 12.1%     | 36,130                 | 5.1%      |
| Asthma                                                | 50,991    | 6.1%      | 10,689              | 8.2%      | 40,302                 | 5.7%      |
| Autoimmune Conditions                                 | 22,663    | 2.7%      | 5,921               | 4.6%      | 16,742                 | 2.4%      |
| Blood Stem Cell Transplant                            | 64        | 0.0%      | 18                  | 0.0%      | 46                     | 0.0%      |
| Chronic Kidney Disease                                | 111,502   | 13.2%     | 42,327              | 32.6%     | 69,175                 | 9.7%      |
| Congestive Heart Failure                              | 65,171    | 7.7%      | 27,409              | 21.1%     | 37,762                 | 5.3%      |
| Chronic Obstructive Pulmonary Disease (COPD)          | 78,865    | 9.4%      | 28,929              | 22.3%     | 49,936                 | 7.0%      |
| Coronary Artery Disease                               | 126,840   | 15.1%     | 42,949              | 33.1%     | 83,891                 | 11.8%     |
| Cystic Fibrosis                                       | 118       | 0.0%      | 23                  | 0.0%      | 95                     | 0.0%      |
| Diabetes Mellitus                                     | 183,790   | 21.8%     | 57,176              | 44.0%     | 126,614                | 17.8%     |
| Drug Abuse Dependence                                 | 9,183     | 1.1%      | 2,435               | 1.9%      | 6,748                  | 0.9%      |
| HIV                                                   | 2,605     | 0.3%      | 498                 | 0.4%      | 2,107                  | 0.3%      |
| Hypertension                                          | 356,107   | 42.3%     | 95,245              | 73.4%     | 260,862                | 36.6%     |
| Interstitial Lung Disease                             | 9,233     | 1.1%      | 3,601               | 2.8%      | 5,632                  | 0.8%      |
| Liver Disease                                         | 33,090    | 3.9%      | 8,834               | 6.8%      | 24,256                 | 3.4%      |
| Neurologic Conditions                                 | 90,725    | 10.8%     | 27,589              | 21.3%     | 63,136                 | 8.9%      |

|                                                             | Overall |       | Evidence of outcome |       | No evidence of outcome |       |
|-------------------------------------------------------------|---------|-------|---------------------|-------|------------------------|-------|
| Obesity                                                     | 159,821 | 19.0% | 39,515              | 30.4% | 120,306                | 16.9% |
| Pulmonary Conditions                                        | 45,451  | 5.4%  | 17,790              | 13.7% | 27,661                 | 3.9%  |
| Sickle Cell Disease                                         | 870     | 0.1%  | 303                 | 0.2%  | 567                    | 0.1%  |
| Smoking                                                     | 97,027  | 11.5% | 29,516              | 22.7% | 67,511                 | 9.5%  |
| Solid Organ or Stem Cell Transplant                         | 644     | 0.1%  | 251                 | 0.2%  | 393                    | 0.1%  |
| Solid Organ Transplant                                      | 580     | 0.1%  | 233                 | 0.2%  | 347                    | 0.0%  |
| Vascular Disease                                            | 395,995 | 47.1% | 102,708             | 79.1% | 293,287                | 41.2% |
| Recorded Use Of Prior to Index Event (-1 83, -1)            |         |       |                     |       |                        |       |
| Chemotherapy                                                | 12,323  | 1.5%  | 4,187               | 3.2%  | 8,136                  | 1.1%  |
| Glucocorticoids Inhaled                                     | 46,355  | 5.5%  | 13,558              | 10.4% | 32,797                 | 4.6%  |
| Glucocorticoids NonSystemic                                 | 98,245  | 11.7% | 23,690              | 18.3% | 74,555                 | 10.5% |
| Glucocorticoids Ophthalmic                                  | 10,427  | 1.2%  | 2,520               | 1.9%  | 7,907                  | 1.1%  |
| Glucocorticoids Systemic                                    | 192,542 | 22.9% | 44,090              | 34.0% | 148,452                | 20.9% |
| Glucocorticoids Topical                                     | 47,825  | 5.7%  | 9,585               | 7.4%  | 38,240                 | 5.4%  |
| Immune Modulators                                           | 23,000  | 2.7%  | 7,010               | 5.4%  | 15,990                 | 2.2%  |
| Immunosuppressants                                          | 13,385  | 1.6%  | 3,893               | 3.0%  | 9,492                  | 1.3%  |
| Recent Use Of Certain Treatments (-30, 0)                   |         |       |                     |       |                        |       |
| Angiotensin-converting enzyme (ACE) inhibitors              | 52,106  | 6.2%  | 11,858              | 9.1%  | 40,248                 | 5.7%  |
| Angiotensin receptor blockers (ARBs)                        | 47,339  | 5.6%  | 11,220              | 8.6%  | 36,119                 | 5.1%  |
| Vasopressors                                                | 2,343   | 0.3%  | 1,475               | 1.1%  | 868                    | 0.1%  |
| Comorbidity Burden (-183,-1)                                |         |       |                     |       |                        |       |
| Charlson/Elixhauser combined comorbidity score <sup>3</sup> | 1.2     | 2.3   | 2.8                 | 3.3   | 0.9                    | 2.0   |
| Symptoms at Diagnosis (-1, 14)                              |         |       |                     |       |                        |       |
| Cough                                                       | 170,838 | 20.3% | 40,337              | 31.1% | 130,501                | 18.3% |
| Diarrhea                                                    | 32,923  | 3.9%  | 14,648              | 11.3% | 18,275                 | 2.6%  |
| Dyspnea/Short of Breath                                     | 170,822 | 20.3% | 98,452              | 75.8% | 72,370                 | 10.2% |
| Fever                                                       | 101,366 | 12.0% | 35,351              | 27.2% | 66,015                 | 9.3%  |
| Headache                                                    | 9,883   | 1.2%  | 1,995               | 1.5%  | 7,888                  | 1.1%  |
| Malaise or Fatigue                                          | 108,347 | 12.9% | 45,188              | 34.8% | 63,159                 | 8.9%  |

|                                                   | Overall |      | Evidence of outcome |       | No evidence of outcome |      |
|---------------------------------------------------|---------|------|---------------------|-------|------------------------|------|
| Multisystem Inflammatory Syndrome                 | 106     | 0.0% | 79                  | 0.1%  | 27                     | 0.0% |
| Myalgia                                           | 21,536  | 2.6% | 3,440               | 2.7%  | 18,096                 | 2.5% |
| Nasal Congestion                                  | 21,064  | 2.5% | 1,508               | 1.2%  | 19,556                 | 2.7% |
| Nausea or Vomiting                                | 37,557  | 4.5% | 14,670              | 11.3% | 22,887                 | 3.2% |
| Smell or Taste Disturbance                        | 17,387  | 2.1% | 1,520               | 1.2%  | 15,867                 | 2.2% |
| Sore Throat                                       | 29,710  | 3.5% | 2,239               | 1.7%  | 27,471                 | 3.9% |
| Health Service Utilization Intensity              |         |      |                     |       |                        |      |
| Mean number of ambulatory encounters              | 8.5     | 11.7 | 13.1                | 16.8  | 7.7                    | 10.3 |
| Mean number of emergency room encounters          | 0.5     | 1.6  | 1.0                 | 2.6   | 0.4                    | 1.4  |
| Mean number of inpatient hospital encounters      | 0.1     | 0.4  | 0.3                 | 0.7   | 0.1                    | 0.4  |
| Mean number of non-acute institutional encounters | 0.0     | 0.3  | 0.1                 | 0.4   | 0.0                    | 0.2  |
| Mean number of other ambulatory encounters        | 1.5     | 5.6  | 3.4                 | 8.9   | 1.2                    | 4.7  |
| Mean number of filled prescriptions               | 12.2    | 16.0 | 20.3                | 20.0  | 10.7                   | 14.9 |
| Mean number of generics dispensed                 | 5.2     | 5.0  | 8.6                 | 6.0   | 4.6                    | 4.7  |
| Mean number of unique drug classes dispensed      | 4.9     | 4.6  | 8.0                 | 5.4   | 4.4                    | 4.3  |

Footnotes: 1Value represents standard deviation where no % follows the value. 2These variables were calculated only among those with a known SES information. 3The Charlson/Elixhauser Combined Comorbidity Score is calculated based on comorbidities observed during a requester-defined window around the exposure episode start date. (Gagne JJ, Glynn RJ, Avorn J, Levin R, Schneeweiss S. A combined comorbidity score predicted mortality in elderly patients better than existing scores. J Clin Epidemiol. 2011;64(7):749-759) N/A: Not Applicable

## Additional File 4: Baseline Characteristics of Individuals Hospitalized with COVID-19 (U07.1 diagnosis code in the inpatient care setting) between April 1, 2020 and March 31, 2021, and with All SES Indicators Available in the Sentinel Distributed Database, Overall and by Race

|                             | Overall     |                            | Asian       |                            | Black or African American |                            | American Indian or Alaska Native |                            | Native Hawaiian or Other Pacific Islander |                            | White       |                            | Unknown Race |                            | Known Race (Asian or Black or African American or American Indian or Alaska Native or Native Hawaiian or Other Pacific Islander or White) |                            |
|-----------------------------|-------------|----------------------------|-------------|----------------------------|---------------------------|----------------------------|----------------------------------|----------------------------|-------------------------------------------|----------------------------|-------------|----------------------------|--------------|----------------------------|-------------------------------------------------------------------------------------------------------------------------------------------|----------------------------|
|                             | Number/Mean | Percent/Standard Deviation | Number/Mean | Percent/Standard Deviation | Number/Mean               | Percent/Standard Deviation | Number/Mean                      | Percent/Standard Deviation | Number/Mean                               | Percent/Standard Deviation | Number/Mean | Percent/Standard Deviation | Number/Mean  | Percent/Standard Deviation | Number/Mean                                                                                                                               | Percent/Standard Deviation |
| Patient Characteristics     |             |                            |             |                            |                           |                            |                                  |                            |                                           |                            |             |                            |              |                            |                                                                                                                                           |                            |
| Unique patients             | 128,167     | N/A                        | 1,844       | N/A                        | 22,995                    | N/A                        | 541                              | N/A                        | 1,154                                     | N/A                        | 72,172      | N/A                        | 29,461       | N/A                        | 98,706                                                                                                                                    | N/A                        |
| Demographic Characteristics |             |                            |             |                            |                           |                            |                                  |                            |                                           |                            |             |                            |              |                            |                                                                                                                                           |                            |
| Age (years)                 | 71.8        | 13.0                       | 68.0        | 12.8                       | 71.1                      | 11.5                       | 68.9                             | 11.5                       | 73.3                                      | 8.8                        | 74.6        | 11.0                       | 65.6         | 16.6                       | 73.6                                                                                                                                      | 11.3                       |
| Age                         |             |                            |             |                            |                           |                            |                                  |                            |                                           |                            |             |                            |              |                            |                                                                                                                                           |                            |
| 0-5 years                   | 70          | 0.1%                       | 0           | 0.0%                       | 0                         | 0.0%                       | 0                                | 0.0%                       | 0                                         | 0.0%                       | 8           | 0.0%                       | 62           | 0.2%                       | 8                                                                                                                                         | 0.0%                       |
| 6-11 years                  | 41          | 0.0%                       | 0           | 0.0%                       | 1                         | 0.0%                       | 0                                | 0.0%                       | 0                                         | 0.0%                       | 3           | 0.0%                       | 37           | 0.1%                       | 4                                                                                                                                         | 0.0%                       |
| 12-18 years                 | 169         | 0.1%                       | 0           | 0.0%                       | 6                         | 0.0%                       | 0                                | 0.0%                       | 0                                         | 0.0%                       | 22          | 0.0%                       | 141          | 0.5%                       | 28                                                                                                                                        | 0.0%                       |
| 19-29 years                 | 1,162       | 0.9%                       | 24          | 1.3%                       | 89                        | 0.4%                       | 7                                | 1.3%                       | 2                                         | 0.2%                       | 222         | 0.3%                       | 818          | 2.8%                       | 344                                                                                                                                       | 0.3%                       |
| 30-39 years                 | 2,502       | 2.0%                       | 105         | 5.7%                       | 342                       | 1.5%                       | 9                                | 1.7%                       | 11                                        | 1.0%                       | 548         | 0.8%                       | 1,487        | 5.0%                       | 1,015                                                                                                                                     | 1.0%                       |
| 40-49 years                 | 4,643       | 3.6%                       | 122         | 6.6%                       | 719                       | 3.1%                       | 29                               | 5.4%                       | 22                                        | 1.9%                       | 1,291       | 1.8%                       | 2,460        | 8.4%                       | 2,183                                                                                                                                     | 2.2%                       |
| 50-64 years                 | 20,680      | 16.1%                      | 283         | 15.3%                      | 4,128                     | 18.0%                      | 113                              | 20.9%                      | 99                                        | 8.6%                       | 8,782       | 12.2%                      | 7,275        | 24.7%                      | 13,405                                                                                                                                    | 13.6%                      |
| 65-74 years                 | 43,280      | 33.8%                      | 703         | 38.1%                      | 9,282                     | 40.4%                      | 211                              | 39.0%                      | 508                                       | 44.0%                      | 24,464      | 33.9%                      | 8,112        | 27.5%                      | 35,168                                                                                                                                    | 35.6%                      |

|                                           | Overall |       | Asian |        | Black or African American |        | American Indian or Alaska Native |        | Native Hawaiian or Other Pacific Islander |        | White  |        | Unknown Race |        | Known Race (Asian or Black or African American or American Indian or Alaska Native or Native Hawaiian or Other Pacific Islander or White) |       |
|-------------------------------------------|---------|-------|-------|--------|---------------------------|--------|----------------------------------|--------|-------------------------------------------|--------|--------|--------|--------------|--------|-------------------------------------------------------------------------------------------------------------------------------------------|-------|
|                                           |         |       |       |        |                           |        |                                  |        |                                           |        |        |        |              |        |                                                                                                                                           |       |
| ≥ 75 years                                | 55,620  | 43.4% | 607   | 32.9%  | 8,428                     | 36.7%  | 172                              | 31.8%  | 512                                       | 44.4%  | 36,832 | 51.0%  | 9,069        | 30.8%  | 46,551                                                                                                                                    | 47.2% |
| Sex                                       |         |       |       |        |                           |        |                                  |        |                                           |        |        |        |              |        |                                                                                                                                           |       |
| Female                                    | 62,192  | 48.5% | 794   | 43.1%  | 12,855                    | 55.9%  | 290                              | 53.6%  | 429                                       | 37.2%  | 34,362 | 47.6%  | 13,462       | 45.7%  | 48,730                                                                                                                                    | 49.4% |
| Male                                      | 65,975  | 51.5% | 1,050 | 56.9%  | 10,140                    | 44.1%  | 251                              | 46.4%  | 725                                       | 62.8%  | 37,810 | 52.4%  | 15,999       | 54.3%  | 49,976                                                                                                                                    | 50.6% |
| Race                                      |         |       |       |        |                           |        |                                  |        |                                           |        |        |        |              |        |                                                                                                                                           |       |
| American Indian or Alaska Native          | 541     | 0.4%  | 0     | 0.0%   | 0                         | 0.0%   | 541                              | 100.0% | 0                                         | 0.0%   | 0      | 0.0%   | 0            | 0.0%   | 541                                                                                                                                       | 0.5%  |
| Asian                                     | 1,844   | 1.4%  | 1,844 | 100.0% | 0                         | 0.0%   | 0                                | 0.0%   | 0                                         | 0.0%   | 0      | 0.0%   | 0            | 0.0%   | 1,844                                                                                                                                     | 1.9%  |
| Black or African American                 | 22,995  | 17.9% | 0     | 0.0%   | 22,995                    | 100.0% | 0                                | 0.0%   | 0                                         | 0.0%   | 0      | 0.0%   | 0            | 0.0%   | 22,995                                                                                                                                    | 23.3% |
| Native Hawaiian or Other Pacific Islander | 1,154   | 0.9%  | 0     | 0.0%   | 0                         | 0.0%   | 0                                | 0.0%   | 1,154                                     | 100.0% | 0      | 0.0%   | 0            | 0.0%   | 1,154                                                                                                                                     | 1.2%  |
| Unknown                                   | 29,461  | 23.0% | 0     | 0.0%   | 0                         | 0.0%   | 0                                | 0.0%   | 0                                         | 0.0%   | 0      | 0.0%   | 29,461       | 100.0% | 0                                                                                                                                         | 0.0%  |
| White                                     | 72,172  | 56.3% | 0     | 0.0%   | 0                         | 0.0%   | 0                                | 0.0%   | 0                                         | 0.0%   | 72,172 | 100.0% | 0            | 0.0%   | 72,172                                                                                                                                    | 73.1% |
| Hispanic origin                           |         |       |       |        |                           |        |                                  |        |                                           |        |        |        |              |        |                                                                                                                                           |       |
| Yes                                       | 5,507   | 4.3%  | 82    | 4.4%   | 50                        | 0.2%   | 53                               | 9.8%   | 6                                         | 0.5%   | 239    | 0.3%   | 5,077        | 17.2%  | 430                                                                                                                                       | 0.4%  |
| No                                        | 78,104  | 60.9% | 1,050 | 56.9%  | 18,458                    | 80.3%  | 409                              | 75.6%  | 1,115                                     | 96.6%  | 57,006 | 79.0%  | 66           | 0.2%   | 78,038                                                                                                                                    | 79.1% |
| Unknown                                   | 44,556  | 34.8% | 712   | 38.6%  | 4,487                     | 19.5%  | 79                               | 14.6%  | 33                                        | 2.9%   | 14,927 | 20.7%  | 24,318       | 82.5%  | 20,238                                                                                                                                    | 20.5% |
| Month-Year of Cohort Entry                |         |       |       |        |                           |        |                                  |        |                                           |        |        |        |              |        |                                                                                                                                           |       |
| April 2020                                | 6,117   | 4.8%  | 137   | 7.4%   | 2,025                     | 8.8%   | 22                               | 4.1%   | 50                                        | 4.3%   | 2,670  | 3.7%   | 1,213        | 4.1%   | 4,904                                                                                                                                     | 5.0%  |
| May 2020                                  | 3,284   | 2.6%  | 56    | 3.0%   | 869                       | 3.8%   | 17                               | 3.1%   | 36                                        | 3.1%   | 1,663  | 2.3%   | 643          | 2.2%   | 2,641                                                                                                                                     | 2.7%  |

|                           | Overall |       | Asian |       | Black or African American |       | American Indian or Alaska Native |       | Native Hawaiian or Other Pacific Islander |       | White  |       | Unknown Race |       | Known Race (Asian or Black or African American or American Indian or Alaska Native or Native Hawaiian or Other Pacific Islander or White) |       |
|---------------------------|---------|-------|-------|-------|---------------------------|-------|----------------------------------|-------|-------------------------------------------|-------|--------|-------|--------------|-------|-------------------------------------------------------------------------------------------------------------------------------------------|-------|
|                           |         |       |       |       |                           |       |                                  |       |                                           |       |        |       |              |       |                                                                                                                                           |       |
| June 2020                 | 3,853   | 3.0%  | 73    | 4.0%  | 1,011                     | 4.4%  | 15                               | 2.8%  | 46                                        | 4.0%  | 1,840  | 2.5%  | 868          | 2.9%  | 2,985                                                                                                                                     | 3.0%  |
| July 2020                 | 10,577  | 8.3%  | 130   | 7.0%  | 2,701                     | 11.7% | 33                               | 6.1%  | 124                                       | 10.7% | 4,970  | 6.9%  | 2,619        | 8.9%  | 7,958                                                                                                                                     | 8.1%  |
| August 2020               | 7,102   | 5.5%  | 74    | 4.0%  | 1,559                     | 6.8%  | 23                               | 4.3%  | 62                                        | 5.4%  | 3,754  | 5.2%  | 1,630        | 5.5%  | 5,472                                                                                                                                     | 5.5%  |
| September 2020            | 5,256   | 4.1%  | 43    | 2.3%  | 818                       | 3.6%  | 17                               | 3.1%  | 42                                        | 3.6%  | 3,051  | 4.2%  | 1,285        | 4.4%  | 3,971                                                                                                                                     | 4.0%  |
| October 2020              | 9,184   | 7.2%  | 92    | 5.0%  | 1,247                     | 5.4%  | 42                               | 7.8%  | 58                                        | 5.0%  | 5,598  | 7.8%  | 2,147        | 7.3%  | 7,037                                                                                                                                     | 7.1%  |
| November 2020             | 19,254  | 15.0% | 252   | 13.7% | 2,394                     | 10.4% | 84                               | 15.5% | 156                                       | 13.5% | 11,690 | 16.2% | 4,678        | 15.9% | 14,576                                                                                                                                    | 14.8% |
| December 2020             | 25,859  | 20.2% | 368   | 20.0% | 3,765                     | 16.4% | 121                              | 22.4% | 226                                       | 19.6% | 15,409 | 21.4% | 5,970        | 20.3% | 19,889                                                                                                                                    | 20.1% |
| January 2021              | 21,992  | 17.2% | 354   | 19.2% | 3,727                     | 16.2% | 121                              | 22.4% | 227                                       | 19.7% | 12,853 | 17.8% | 4,710        | 16.0% | 17,282                                                                                                                                    | 17.5% |
| February 2021             | 9,446   | 7.4%  | 154   | 8.4%  | 1,779                     | 7.7%  | 31                               | 5.7%  | 78                                        | 6.8%  | 5,323  | 7.4%  | 2,081        | 7.1%  | 7,365                                                                                                                                     | 7.5%  |
| March 2021                | 6,243   | 4.9%  | 111   | 6.0%  | 1,100                     | 4.8%  | 15                               | 2.8%  | 49                                        | 4.2%  | 3,351  | 4.6%  | 1,617        | 5.5%  | 4,626                                                                                                                                     | 4.7%  |
| Census Bureau (CB) Region |         |       |       |       |                           |       |                                  |       |                                           |       |        |       |              |       |                                                                                                                                           |       |
| Midwest                   | 28,436  | 22.2% | 271   | 14.7% | 3,634                     | 15.8% | 55                               | 10.2% | 233                                       | 20.2% | 16,665 | 23.1% | 7,578        | 25.7% | 20,858                                                                                                                                    | 21.1% |
| Northeast                 | 12,005  | 9.4%  | 213   | 11.6% | 1,721                     | 7.5%  | 12                               | 2.2%  | 62                                        | 5.4%  | 5,162  | 7.2%  | 4,835        | 16.4% | 7,170                                                                                                                                     | 7.3%  |
| South                     | 72,144  | 56.3% | 679   | 36.8% | 16,784                    | 73.0% | 240                              | 44.4% | 527                                       | 45.7% | 41,301 | 57.2% | 12,613       | 42.8% | 59,531                                                                                                                                    | 60.3% |
| West                      | 15,582  | 12.2% | 681   | 36.9% | 856                       | 3.7%  | 234                              | 43.3% | 332                                       | 28.8% | 9,044  | 12.5% | 4,435        | 15.1% | 11,147                                                                                                                                    | 11.3% |
| CB Region (Invalid)       | 0       | 0.0%  | 0     | 0.0%  | 0                         | 0.0%  | 0                                | 0.0%  | 0                                         | 0.0%  | 0      | 0.0%  | 0            | 0.0%  | 0                                                                                                                                         | 0.0%  |
| CB Region (Missing)       | 0       | 0.0%  | 0     | 0.0%  | 0                         | 0.0%  | 0                                | 0.0%  | 0                                         | 0.0%  | 0      | 0.0%  | 0            | 0.0%  | 0                                                                                                                                         | 0.0%  |
| CB Region (Other)         | 0       | 0.0%  | 0     | 0.0%  | 0                         | 0.0%  | 0                                | 0.0%  | 0                                         | 0.0%  | 0      | 0.0%  | 0            | 0.0%  | 0                                                                                                                                         | 0.0%  |
| Urbanicity                |         |       |       |       |                           |       |                                  |       |                                           |       |        |       |              |       |                                                                                                                                           |       |

|                                                       | Overall   |           | Asian     |           | Black or African American |           | American Indian or Alaska Native |           | Native Hawaiian or Other Pacific Islander |           | White     |           | Unknown Race |           | Known Race (Asian or Black or African American or American Indian or Alaska Native or Native Hawaiian or Other Pacific Islander or White) |           |
|-------------------------------------------------------|-----------|-----------|-----------|-----------|---------------------------|-----------|----------------------------------|-----------|-------------------------------------------|-----------|-----------|-----------|--------------|-----------|-------------------------------------------------------------------------------------------------------------------------------------------|-----------|
|                                                       |           |           |           |           |                           |           |                                  |           |                                           |           |           |           |              |           |                                                                                                                                           |           |
| Urban (population >= 50,000)                          | 81,580    | 63.7%     | 1,700     | 92.2%     | 16,673                    | 72.5%     | 234                              | 43.3%     | 924                                       | 80.1%     | 41,274    | 57.2%     | 20,775       | 70.5%     | 60,805                                                                                                                                    | 61.6%     |
| Suburban (population 2,500 - 49,999)                  | 1,519     | 1.2%      | 7         | 0.4%      | 292                       | 1.3%      | 6                                | 1.1%      | 5                                         | 0.4%      | 918       | 1.3%      | 291          | 1.0%      | 1,228                                                                                                                                     | 1.2%      |
| Rural (population < 2,500)                            | 45,066    | 35.2%     | 137       | 7.4%      | 6,029                     | 26.2%     | 301                              | 55.6%     | 225                                       | 19.5%     | 29,980    | 41.5%     | 8,394        | 28.5%     | 36,672                                                                                                                                    | 37.2%     |
| Zip Code Unknown or Urbanicity Not Available          | 2         | 0.0%      | 0         | 0.0%      | 1                         | 0.0%      | 0                                | 0.0%      | 0                                         | 0.0%      | 0         | 0.0%      | 1            | 0.0%      | 1                                                                                                                                         | 0.0%      |
| Proxies for Socioeconomic Status (SES)                |           |           |           |           |                           |           |                                  |           |                                           |           |           |           |              |           |                                                                                                                                           |           |
| Average Median Household Income <sup>2</sup>          | 59,642.1  | 21,790.3  | 74,312.9  | 26,438.3  | 49,821.0                  | 18,812.9  | 52,968.6                         | 18,463.8  | 64,793.0                                  | 23,512.0  | 61,387.7  | 21,137.5  | 62,034.1     | 22,953.9  | 58,928.2                                                                                                                                  | 21,369.5  |
| Average Median Home Value <sup>2</sup>                | 199,835.9 | 131,672.4 | 322,685.3 | 196,328.0 | 170,627.7                 | 114,732.6 | 170,280.6                        | 106,737.1 | 253,585.6                                 | 175,105.9 | 198,495.2 | 122,403.7 | 216,666.3    | 150,759.4 | 194,812.5                                                                                                                                 | 124,798.8 |
| Average Percent Unemployment <sup>2</sup>             | 5.8       | 3.1       | 5.2       | 2.0       | 7.8                       | 4.0       | 7.2                              | 4.7       | 5.6                                       | 2.6       | 5.3       | 2.6       | 5.6          | 2.9       | 5.9                                                                                                                                       | 3.2       |
| Missingness in Proxies for Socioeconomic Status (SES) |           |           |           |           |                           |           |                                  |           |                                           |           |           |           |              |           |                                                                                                                                           |           |
| Median Household Income Available                     | 128,167   | 100.0%    | 1,844     | 100.0%    | 22,995                    | 100.0%    | 541                              | 100.0%    | 1,154                                     | 100.0%    | 72,172    | 100.0%    | 29,461       | 100.0%    | 98,706                                                                                                                                    | 100.0%    |
| Median Home Value Available                           | 128,167   | 100.0%    | 1,844     | 100.0%    | 22,995                    | 100.0%    | 541                              | 100.0%    | 1,154                                     | 100.0%    | 72,172    | 100.0%    | 29,461       | 100.0%    | 98,706                                                                                                                                    | 100.0%    |
| Percent Unemployment Available                        | 128,167   | 100.0%    | 1,844     | 100.0%    | 22,995                    | 100.0%    | 541                              | 100.0%    | 1,154                                     | 100.0%    | 72,172    | 100.0%    | 29,461       | 100.0%    | 98,706                                                                                                                                    | 100.0%    |
| All SES Indicators Available                          | 128,167   | 100.0%    | 1,844     | 100.0%    | 22,995                    | 100.0%    | 541                              | 100.0%    | 1,154                                     | 100.0%    | 72,172    | 100.0%    | 29,461       | 100.0%    | 98,706                                                                                                                                    | 100.0%    |
| Recorded History Of Prior to Index Event (-183, -1)   |           |           |           |           |                           |           |                                  |           |                                           |           |           |           |              |           |                                                                                                                                           |           |
| Adult BMI 19.9 or less                                | 1,897     | 1.5%      | 29        | 1.6%      | 405                       | 1.8%      | 2                                | 0.4%      | 25                                        | 2.2%      | 1,127     | 1.6%      | 309          | 1.0%      | 1,588                                                                                                                                     | 1.6%      |
| Adult BMI 20-29                                       | 16,385    | 12.8%     | 304       | 16.5%     | 3,128                     | 13.6%     | 30                               | 5.5%      | 222                                       | 19.2%     | 9,703     | 13.4%     | 2,998        | 10.2%     | 13,387                                                                                                                                    | 13.6%     |
| Adult BMI 30-39                                       | 20,590    | 16.1%     | 131       | 7.1%      | 4,476                     | 19.5%     | 53                               | 9.8%      | 150                                       | 13.0%     | 11,751    | 16.3%     | 4,029        | 13.7%     | 16,561                                                                                                                                    | 16.8%     |

|                                              | Overall |       | Asian |       | Black or African American |       | American Indian or Alaska Native |       | Native Hawaiian or Other Pacific Islander |       | White  |       | Unknown Race |       | Known Race (Asian or Black or African American or American Indian or Alaska Native or Native Hawaiian or Other Pacific Islander or White) |       |
|----------------------------------------------|---------|-------|-------|-------|---------------------------|-------|----------------------------------|-------|-------------------------------------------|-------|--------|-------|--------------|-------|-------------------------------------------------------------------------------------------------------------------------------------------|-------|
|                                              |         |       |       |       |                           |       |                                  |       |                                           |       |        |       |              |       |                                                                                                                                           |       |
| Adult BMI 40 or greater                      | 10,338  | 8.1%  | 36    | 2.0%  | 2,645                     | 11.5% | 37                               | 6.8%  | 45                                        | 3.9%  | 5,390  | 7.5%  | 2,185        | 7.4%  | 8,153                                                                                                                                     | 8.3%  |
| Alcohol or Drug Abuse                        | 5,479   | 4.3%  | 17    | 0.9%  | 1,171                     | 5.1%  | 30                               | 5.5%  | 37                                        | 3.2%  | 3,196  | 4.4%  | 1,028        | 3.5%  | 4,451                                                                                                                                     | 4.5%  |
| Alcohol Use Abuse                            | 3,439   | 2.7%  | 14    | 0.8%  | 733                       | 3.2%  | 20                               | 3.7%  | 21                                        | 1.8%  | 2,016  | 2.8%  | 635          | 2.2%  | 2,804                                                                                                                                     | 2.8%  |
| Any Cancer                                   | 15,785  | 12.3% | 149   | 8.1%  | 3,085                     | 13.4% | 55                               | 10.2% | 116                                       | 10.1% | 9,448  | 13.1% | 2,932        | 10.0% | 12,853                                                                                                                                    | 13.0% |
| Asthma                                       | 11,284  | 8.8%  | 146   | 7.9%  | 2,564                     | 11.2% | 56                               | 10.4% | 83                                        | 7.2%  | 5,982  | 8.3%  | 2,453        | 8.3%  | 8,831                                                                                                                                     | 8.9%  |
| Autoimmune Conditions                        | 5,996   | 4.7%  | 37    | 2.0%  | 1,425                     | 6.2%  | 35                               | 6.5%  | 55                                        | 4.8%  | 3,369  | 4.7%  | 1,075        | 3.6%  | 4,921                                                                                                                                     | 5.0%  |
| Blood Stem Cell Transplant                   | 16      | 0.0%  | 0     | 0.0%  | 2                         | 0.0%  | 0                                | 0.0%  | 0                                         | 0.0%  | 8      | 0.0%  | 6            | 0.0%  | 10                                                                                                                                        | 0.0%  |
| Chronic Kidney Disease                       | 43,397  | 33.9% | 511   | 27.7% | 9,818                     | 42.7% | 146                              | 27.0% | 420                                       | 36.4% | 24,957 | 34.6% | 7,545        | 25.6% | 35,852                                                                                                                                    | 36.3% |
| Congestive Heart Failure                     | 28,483  | 22.2% | 207   | 11.2% | 6,327                     | 27.5% | 84                               | 15.5% | 206                                       | 17.9% | 17,053 | 23.6% | 4,606        | 15.6% | 23,877                                                                                                                                    | 24.2% |
| Chronic Obstructive Pulmonary Disease (COPD) | 30,446  | 23.8% | 190   | 10.3% | 5,208                     | 22.6% | 104                              | 19.2% | 189                                       | 16.4% | 19,945 | 27.6% | 4,810        | 16.3% | 25,636                                                                                                                                    | 26.0% |
| Coronary Artery Disease                      | 44,283  | 34.6% | 456   | 24.7% | 8,066                     | 35.1% | 141                              | 26.1% | 373                                       | 32.3% | 27,695 | 38.4% | 7,552        | 25.6% | 36,731                                                                                                                                    | 37.2% |
| Cystic Fibrosis                              | 22      | 0.0%  | 0     | 0.0%  | 1                         | 0.0%  | 0                                | 0.0%  | 0                                         | 0.0%  | 16     | 0.0%  | 5            | 0.0%  | 17                                                                                                                                        | 0.0%  |
| Diabetes Mellitus                            | 57,693  | 45.0% | 872   | 47.3% | 12,989                    | 56.5% | 283                              | 52.3% | 614                                       | 53.2% | 31,439 | 43.6% | 11,496       | 39.0% | 46,197                                                                                                                                    | 46.8% |
| Drug Abuse Dependence                        | 2,533   | 2.0%  | 5     | 0.3%  | 567                       | 2.5%  | 15                               | 2.8%  | 18                                        | 1.6%  | 1,442  | 2.0%  | 486          | 1.6%  | 2,047                                                                                                                                     | 2.1%  |
| HIV                                          | 502     | 0.4%  | 2     | 0.1%  | 241                       | 1.0%  | 0                                | 0.0%  | 2                                         | 0.2%  | 140    | 0.2%  | 117          | 0.4%  | 385                                                                                                                                       | 0.4%  |
| Hypertension                                 | 96,573  | 75.3% | 1,201 | 65.1% | 19,744                    | 85.9% | 365                              | 67.5% | 872                                       | 75.6% | 55,748 | 77.2% | 18,643       | 63.3% | 77,930                                                                                                                                    | 79.0% |
| Interstitial Lung Disease                    | 3,959   | 3.1%  | 41    | 2.2%  | 649                       | 2.8%  | 16                               | 3.0%  | 34                                        | 2.9%  | 2,478  | 3.4%  | 741          | 2.5%  | 3,218                                                                                                                                     | 3.3%  |
| Liver Disease                                | 9,177   | 7.2%  | 115   | 6.2%  | 1,571                     | 6.8%  | 50                               | 9.2%  | 96                                        | 8.3%  | 5,322  | 7.4%  | 2,023        | 6.9%  | 7,154                                                                                                                                     | 7.2%  |

|                                                 | Overall |       | Asian |       | Black or African American |       | American Indian or Alaska Native |       | Native Hawaiian or Other Pacific Islander |       | White  |       | Unknown Race |       | Known Race (Asian or Black or African American or American Indian or Alaska Native or Native Hawaiian or Other Pacific Islander or White) |       |
|-------------------------------------------------|---------|-------|-------|-------|---------------------------|-------|----------------------------------|-------|-------------------------------------------|-------|--------|-------|--------------|-------|-------------------------------------------------------------------------------------------------------------------------------------------|-------|
|                                                 |         |       |       |       |                           |       |                                  |       |                                           |       |        |       |              |       |                                                                                                                                           |       |
| Neurologic Conditions                           | 28,489  | 22.2% | 207   | 11.2% | 5,165                     | 22.5% | 96                               | 17.7% | 208                                       | 18.0% | 17,937 | 24.9% | 4,876        | 16.6% | 23,613                                                                                                                                    | 23.9% |
| Obesity                                         | 40,071  | 31.3% | 266   | 14.4% | 9,032                     | 39.3% | 137                              | 25.3% | 250                                       | 21.7% | 21,978 | 30.5% | 8,408        | 28.5% | 31,663                                                                                                                                    | 32.1% |
| Pulmonary Conditions                            | 28,943  | 22.6% | 342   | 18.5% | 4,858                     | 21.1% | 133                              | 24.6% | 216                                       | 18.7% | 16,536 | 22.9% | 6,858        | 23.3% | 22,085                                                                                                                                    | 22.4% |
| Sickle Cell Disease                             | 305     | 0.2%  | 2     | 0.1%  | 224                       | 1.0%  | 0                                | 0.0%  | 0                                         | 0.0%  | 14     | 0.0%  | 65           | 0.2%  | 240                                                                                                                                       | 0.2%  |
| Smoking                                         | 32,021  | 25.0% | 205   | 11.1% | 5,964                     | 25.9% | 128                              | 23.7% | 226                                       | 19.6% | 20,262 | 28.1% | 5,236        | 17.8% | 26,785                                                                                                                                    | 27.1% |
| Solid Organ or Stem Cell Transplant             | 249     | 0.2%  | 7     | 0.4%  | 62                        | 0.3%  | 0                                | 0.0%  | 4                                         | 0.3%  | 119    | 0.2%  | 57           | 0.2%  | 192                                                                                                                                       | 0.2%  |
| Solid Organ Transplant                          | 233     | 0.2%  | 7     | 0.4%  | 60                        | 0.3%  | 0                                | 0.0%  | 4                                         | 0.3%  | 111    | 0.2%  | 51           | 0.2%  | 182                                                                                                                                       | 0.2%  |
| Vascular Disease                                | 104,226 | 81.3% | 1,282 | 69.5% | 20,497                    | 89.1% | 400                              | 73.9% | 932                                       | 80.8% | 60,596 | 84.0% | 20,519       | 69.6% | 83,707                                                                                                                                    | 84.8% |
| Recorded Use Of Prior to Index Event (-183, -1) |         |       |       |       |                           |       |                                  |       |                                           |       |        |       |              |       |                                                                                                                                           |       |
| Chemotherapy                                    | 4,150   | 3.2%  | 42    | 2.3%  | 798                       | 3.5%  | 13                               | 2.4%  | 37                                        | 3.2%  | 2,390  | 3.3%  | 870          | 3.0%  | 3,280                                                                                                                                     | 3.3%  |
| Glucocorticoids Inhaled                         | 14,304  | 11.2% | 149   | 8.1%  | 2,411                     | 10.5% | 48                               | 8.9%  | 81                                        | 7.0%  | 8,846  | 12.3% | 2,769        | 9.4%  | 11,535                                                                                                                                    | 11.7% |
| Glucocorticoids NonSystemic                     | 24,189  | 18.9% | 340   | 18.4% | 4,190                     | 18.2% | 79                               | 14.6% | 190                                       | 16.5% | 14,508 | 20.1% | 4,882        | 16.6% | 19,307                                                                                                                                    | 19.6% |
| Glucocorticoids Ophthalmic                      | 2,492   | 1.9%  | 45    | 2.4%  | 514                       | 2.2%  | 8                                | 1.5%  | 28                                        | 2.4%  | 1,402  | 1.9%  | 495          | 1.7%  | 1,997                                                                                                                                     | 2.0%  |
| Glucocorticoids Systemic                        | 50,415  | 39.3% | 557   | 30.2% | 8,298                     | 36.1% | 204                              | 37.7% | 360                                       | 31.2% | 30,043 | 41.6% | 10,953       | 37.2% | 39,462                                                                                                                                    | 40.0% |
| Glucocorticoids Topical                         | 9,431   | 7.4%  | 173   | 9.4%  | 1,618                     | 7.0%  | 31                               | 5.7%  | 105                                       | 9.1%  | 5,529  | 7.7%  | 1,975        | 6.7%  | 7,456                                                                                                                                     | 7.6%  |
| Immune Modulators                               | 7,020   | 5.5%  | 99    | 5.4%  | 1,294                     | 5.6%  | 31                               | 5.7%  | 58                                        | 5.0%  | 3,957  | 5.5%  | 1,581        | 5.4%  | 5,439                                                                                                                                     | 5.5%  |
| Immunosuppressants                              | 3,881   | 3.0%  | 45    | 2.4%  | 847                       | 3.7%  | 23                               | 4.3%  | 38                                        | 3.3%  | 2,116  | 2.9%  | 812          | 2.8%  | 3,069                                                                                                                                     | 3.1%  |
| Recent Use Of Certain Treatments (-30, 0)       |         |       |       |       |                           |       |                                  |       |                                           |       |        |       |              |       |                                                                                                                                           |       |

|                                                 | Overall |       | Asian |       | Black or African American |       | American Indian or Alaska Native |       | Native Hawaiian or Other Pacific Islander |       | White  |       | Unknown Race |       | Known Race (Asian or Black or African American or American Indian or Alaska Native or Native Hawaiian or Other Pacific Islander or White) |       |
|-------------------------------------------------|---------|-------|-------|-------|---------------------------|-------|----------------------------------|-------|-------------------------------------------|-------|--------|-------|--------------|-------|-------------------------------------------------------------------------------------------------------------------------------------------|-------|
|                                                 |         |       |       |       |                           |       |                                  |       |                                           |       |        |       |              |       |                                                                                                                                           |       |
| Angiotensin-converting enzyme (ACE) inhibitors  | 11,574  | 9.0%  | 128   | 6.9%  | 1,977                     | 8.6%  | 60                               | 11.1% | 101                                       | 8.8%  | 6,718  | 9.3%  | 2,590        | 8.8%  | 8,984                                                                                                                                     | 9.1%  |
| Angiotensin receptor blockers (ARBs)            | 10,880  | 8.5%  | 213   | 11.6% | 2,376                     | 10.3% | 46                               | 8.5%  | 113                                       | 9.8%  | 5,787  | 8.0%  | 2,345        | 8.0%  | 8,535                                                                                                                                     | 8.6%  |
| Vasopressors                                    | 2,033   | 1.6%  | 42    | 2.3%  | 400                       | 1.7%  | 6                                | 1.1%  | 27                                        | 2.3%  | 1,125  | 1.6%  | 433          | 1.5%  | 1,600                                                                                                                                     | 1.6%  |
| Comorbidity Burden (-183,-1)                    |         |       |       |       |                           |       |                                  |       |                                           |       |        |       |              |       |                                                                                                                                           |       |
| Charlson/Elixhauser combined comorbidity score3 | 3.0     | 3.4   | 1.9   | 2.8   | 3.5                       | 3.5   | 2.4                              | 3.1   | 2.7                                       | 3.3   | 3.2    | 3.4   | 2.3          | 3.1   | 3.3                                                                                                                                       | 3.4   |
| Symptoms at Diagnosis (-1, 14)                  |         |       |       |       |                           |       |                                  |       |                                           |       |        |       |              |       |                                                                                                                                           |       |
| Cough                                           | 31,342  | 24.5% | 515   | 27.9% | 5,499                     | 23.9% | 101                              | 18.7% | 311                                       | 26.9% | 17,471 | 24.2% | 7,445        | 25.3% | 23,897                                                                                                                                    | 24.2% |
| Diarrhea                                        | 13,217  | 10.3% | 165   | 8.9%  | 2,370                     | 10.3% | 58                               | 10.7% | 101                                       | 8.8%  | 7,786  | 10.8% | 2,737        | 9.3%  | 10,480                                                                                                                                    | 10.6% |
| Dyspnea/Short of Breath                         | 96,964  | 75.7% | 1,422 | 77.1% | 17,035                    | 74.1% | 421                              | 77.8% | 880                                       | 76.3% | 55,293 | 76.6% | 21,913       | 74.4% | 75,051                                                                                                                                    | 76.0% |
| Fever                                           | 29,325  | 22.9% | 511   | 27.7% | 5,817                     | 25.3% | 97                               | 17.9% | 278                                       | 24.1% | 15,598 | 21.6% | 7,024        | 23.8% | 22,301                                                                                                                                    | 22.6% |
| Headache                                        | 1,562   | 1.2%  | 31    | 1.7%  | 318                       | 1.4%  | 6                                | 1.1%  | 22                                        | 1.9%  | 773    | 1.1%  | 412          | 1.4%  | 1,150                                                                                                                                     | 1.2%  |
| Malaise or Fatigue                              | 42,856  | 33.4% | 489   | 26.5% | 7,981                     | 34.7% | 139                              | 25.7% | 365                                       | 31.6% | 25,839 | 35.8% | 8,043        | 27.3% | 34,813                                                                                                                                    | 35.3% |
| Multisystem Inflammatory Syndrome               | 86      | 0.1%  | 0     | 0.0%  | 18                        | 0.1%  | 0                                | 0.0%  | 0                                         | 0.0%  | 29     | 0.0%  | 39           | 0.1%  | 47                                                                                                                                        | 0.0%  |
| Myalgia                                         | 2,052   | 1.6%  | 36    | 2.0%  | 328                       | 1.4%  | 10                               | 1.8%  | 20                                        | 1.7%  | 1,109  | 1.5%  | 549          | 1.9%  | 1,503                                                                                                                                     | 1.5%  |
| Nasal Congestion                                | 659     | 0.5%  | 4     | 0.2%  | 105                       | 0.5%  | 1                                | 0.2%  | 4                                         | 0.3%  | 379    | 0.5%  | 166          | 0.6%  | 493                                                                                                                                       | 0.5%  |
| Nausea or Vomiting                              | 13,031  | 10.2% | 131   | 7.1%  | 2,354                     | 10.2% | 55                               | 10.2% | 97                                        | 8.4%  | 7,580  | 10.5% | 2,814        | 9.6%  | 10,217                                                                                                                                    | 10.4% |
| Smell or Taste Disturbance                      | 1,106   | 0.9%  | 17    | 0.9%  | 224                       | 1.0%  | 6                                | 1.1%  | 14                                        | 1.2%  | 575    | 0.8%  | 270          | 0.9%  | 836                                                                                                                                       | 0.8%  |
| Sore Throat                                     | 1,116   | 0.9%  | 21    | 1.1%  | 168                       | 0.7%  | 4                                | 0.7%  | 10                                        | 0.9%  | 618    | 0.9%  | 295          | 1.0%  | 821                                                                                                                                       | 0.8%  |

|                                                   | Overall |      | Asian |      | Black or African American |      | American Indian or Alaska Native |      | Native Hawaiian or Other Pacific Islander |      | White |      | Unknown Race |      | Known Race (Asian or Black or African American or American Indian or Alaska Native or Native Hawaiian or Other Pacific Islander or White) |      |
|---------------------------------------------------|---------|------|-------|------|---------------------------|------|----------------------------------|------|-------------------------------------------|------|-------|------|--------------|------|-------------------------------------------------------------------------------------------------------------------------------------------|------|
|                                                   |         |      |       |      |                           |      |                                  |      |                                           |      |       |      |              |      |                                                                                                                                           |      |
| Health Service Utilization Intensity (-183,-1)    |         |      |       |      |                           |      |                                  |      |                                           |      |       |      |              |      |                                                                                                                                           |      |
| Mean number of ambulatory encounters              | 13.7    | 16.9 | 10.9  | 16.5 | 14.9                      | 20.0 | 11.0                             | 14.6 | 12.3                                      | 16.8 | 13.9  | 15.8 | 12.4         | 17.0 | 14.1                                                                                                                                      | 16.9 |
| Mean number of emergency room encounters          | 1.3     | 2.7  | 0.8   | 2.1  | 1.5                       | 3.3  | 1.5                              | 3.1  | 1.0                                       | 1.9  | 1.3   | 2.7  | 1.2          | 2.4  | 1.4                                                                                                                                       | 2.8  |
| Mean number of inpatient hospital encounters      | 0.3     | 0.7  | 0.1   | 0.5  | 0.3                       | 0.8  | 0.3                              | 0.8  | 0.2                                       | 0.7  | 0.3   | 0.8  | 0.2          | 0.7  | 0.3                                                                                                                                       | 0.8  |
| Mean number of non-acute institutional encounters | 0.1     | 0.5  | 0.0   | 0.3  | 0.1                       | 0.5  | 0.1                              | 0.4  | 0.1                                       | 0.3  | 0.1   | 0.5  | 0.1          | 0.4  | 0.1                                                                                                                                       | 0.5  |
| Mean number of other ambulatory encounters        | 3.7     | 9.2  | 2.0   | 6.9  | 4.1                       | 10.3 | 3.7                              | 8.3  | 2.7                                       | 7.8  | 4.1   | 9.7  | 2.4          | 6.8  | 4.1                                                                                                                                       | 9.8  |
| Mean number of filled prescriptions               | 21.0    | 20.4 | 14.8  | 14.4 | 21.8                      | 19.9 | 21.2                             | 23.6 | 17.0                                      | 16.4 | 22.2  | 21.0 | 18.0         | 19.1 | 21.9                                                                                                                                      | 20.7 |
| Mean number of generics dispensed                 | 9.0     | 6.1  | 7.2   | 4.9  | 9.5                       | 5.9  | 8.1                              | 6.6  | 8.1                                       | 5.3  | 9.4   | 6.2  | 7.7          | 5.7  | 9.4                                                                                                                                       | 6.1  |
| Mean number of unique drug classes dispensed      | 8.4     | 5.5  | 6.7   | 4.4  | 8.8                       | 5.3  | 7.5                              | 6.0  | 7.5                                       | 4.9  | 8.8   | 5.7  | 7.2          | 5.2  | 8.8                                                                                                                                       | 5.6  |

Footnotes: 1Value represents standard deviation where no % follows the value. 2These variables were calculated only among those with a known SES information. 3The Charlson/Elixhauser Combined Comorbidity Score is calculated based on comorbidities observed during a requester-defined window around the exposure episode start date. (Gagne JJ, Glynn RJ, Avorn J, Levin R, Schneeweiss S. A combined comorbidity score predicted mortality in elderly patients better than existing scores. J Clin Epidemiol. 2011;64(7):749-759) N/A: Not Applicable

## Additional File 5: Baseline Characteristics of Individuals Hospitalized with COVID-19 (U07.1 diagnosis code in the inpatient care setting) between April 1, 2020 and March 31, 2021 in the Sentinel Distributed Database, Overall and by Evidence of Critical COVID Outcome

| Patient Characteristics                   | Overall     |                                             | Evidence of outcome |                                             | No evidence of outcome |                                             |
|-------------------------------------------|-------------|---------------------------------------------|---------------------|---------------------------------------------|------------------------|---------------------------------------------|
|                                           | Number/Mean | Percent/<br>Standard Deviation <sup>1</sup> | Number/Mean         | Percent/<br>Standard Deviation <sup>1</sup> | Number/Mean            | Percent/<br>Standard Deviation <sup>1</sup> |
| Unique patients                           | 133,773     | N/A                                         | 77,349              | N/A                                         | 56,424                 | N/A                                         |
| Demographic Characteristics               |             |                                             |                     |                                             |                        |                                             |
| Age (years)                               | 71.6        | 13.1                                        | 72.1                | 12.3                                        | 71.0                   | 14.2                                        |
| Age                                       |             |                                             |                     |                                             |                        |                                             |
| 0-5 years                                 | 78          | 0.1%                                        | 27                  | 0.0%                                        | 51                     | 0.1%                                        |
| 6-11 years                                | 43          | 0.0%                                        | 16                  | 0.0%                                        | 27                     | 0.0%                                        |
| 12-18 years                               | 187         | 0.1%                                        | 65                  | 0.1%                                        | 122                    | 0.2%                                        |
| 19-29 years                               | 1,268       | 0.9%                                        | 438                 | 0.6%                                        | 830                    | 1.5%                                        |
| 30-39 years                               | 2,723       | 2.0%                                        | 1,107               | 1.4%                                        | 1,616                  | 2.9%                                        |
| 40-49 years                               | 5,002       | 3.7%                                        | 2,638               | 3.4%                                        | 2,364                  | 4.2%                                        |
| 50-64 years                               | 21,935      | 16.4%                                       | 12,735              | 16.5%                                       | 9,200                  | 16.3%                                       |
| 65-74 years                               | 44,797      | 33.5%                                       | 26,698              | 34.5%                                       | 18,099                 | 32.1%                                       |
| ≥ 75 years                                | 57,740      | 43.2%                                       | 33,625              | 43.5%                                       | 24,115                 | 42.7%                                       |
| Sex                                       |             |                                             |                     |                                             |                        |                                             |
| Female                                    | 64,820      | 48.5%                                       | 35,124              | 45.4%                                       | 29,696                 | 52.6%                                       |
| Male                                      | 68,953      | 51.5%                                       | 42,225              | 54.6%                                       | 26,728                 | 47.4%                                       |
| Race                                      |             |                                             |                     |                                             |                        |                                             |
| American Indian or Alaska Native          | 550         | 0.4%                                        | 305                 | 0.4%                                        | 245                    | 0.4%                                        |
| Asian                                     | 1,984       | 1.5%                                        | 1,146               | 1.5%                                        | 838                    | 1.5%                                        |
| Black or African American                 | 23,583      | 17.6%                                       | 14,137              | 18.3%                                       | 9,446                  | 16.7%                                       |
| Native Hawaiian or Other Pacific Islander | 1,188       | 0.9%                                        | 750                 | 1.0%                                        | 438                    | 0.8%                                        |
| Unknown                                   | 31,330      | 23.4%                                       | 17,658              | 22.8%                                       | 13,672                 | 24.2%                                       |
| White                                     | 75,138      | 56.2%                                       | 43,353              | 56.0%                                       | 31,785                 | 56.3%                                       |
| Hispanic origin                           |             |                                             |                     |                                             |                        |                                             |

|                                              | Overall  |          | Evidence of outcome |          | No evidence of outcome |          |
|----------------------------------------------|----------|----------|---------------------|----------|------------------------|----------|
| Yes                                          | 5,757    | 4.3%     | 3,507               | 4.5%     | 2,250                  | 4.0%     |
| No                                           | 78,836   | 58.9%    | 46,393              | 60.0%    | 32,443                 | 57.5%    |
| Unknown                                      | 49,180   | 36.8%    | 27,449              | 35.5%    | 21,731                 | 38.5%    |
| Month-Year of Cohort Entry                   |          |          |                     |          |                        |          |
| April 2020                                   | 7,011    | 5.2%     | 4,200               | 5.4%     | 2,811                  | 5.0%     |
| May 2020                                     | 3,624    | 2.7%     | 2,201               | 2.8%     | 1,423                  | 2.5%     |
| June 2020                                    | 3,963    | 3.0%     | 2,598               | 3.4%     | 1,365                  | 2.4%     |
| July 2020                                    | 10,709   | 8.0%     | 6,757               | 8.7%     | 3,952                  | 7.0%     |
| August 2020                                  | 7,234    | 5.4%     | 4,455               | 5.8%     | 2,779                  | 4.9%     |
| September 2020                               | 5,374    | 4.0%     | 3,199               | 4.1%     | 2,175                  | 3.9%     |
| October 2020                                 | 9,445    | 7.1%     | 5,501               | 7.1%     | 3,944                  | 7.0%     |
| November 2020                                | 20,025   | 15.0%    | 11,208              | 14.5%    | 8,817                  | 15.6%    |
| December 2020                                | 26,996   | 20.2%    | 15,251              | 19.7%    | 11,745                 | 20.8%    |
| January 2021                                 | 22,864   | 17.1%    | 12,728              | 16.5%    | 10,136                 | 18.0%    |
| February 2021                                | 9,868    | 7.4%     | 5,621               | 7.3%     | 4,247                  | 7.5%     |
| March 2021                                   | 6,660    | 5.0%     | 3,630               | 4.7%     | 3,030                  | 5.4%     |
| Census Bureau (CB) Region                    |          |          |                     |          |                        |          |
| Midwest                                      | 28,500   | 21.3%    | 15,824              | 20.5%    | 12,676                 | 22.5%    |
| Northeast                                    | 16,960   | 12.7%    | 8,979               | 11.6%    | 7,981                  | 14.1%    |
| South                                        | 72,471   | 54.2%    | 43,222              | 55.9%    | 29,249                 | 51.8%    |
| West                                         | 15,626   | 11.7%    | 9,197               | 11.9%    | 6,429                  | 11.4%    |
| CB Region (Invalid)                          | 66       | 0.0%     | 40                  | 0.1%     | 26                     | 0.0%     |
| CB Region (Missing)                          | 46       | 0.0%     | 17                  | 0.0%     | 29                     | 0.1%     |
| CB Region (Other)                            | 104      | 0.1%     | 70                  | 0.1%     | 34                     | 0.1%     |
| Urbanicity                                   |          |          |                     |          |                        |          |
| Urban (population >= 50,000)                 | 86,049   | 64.3%    | 51,189              | 66.2%    | 34,860                 | 61.8%    |
| Suburban (population 2,500 - 49,999)         | 1,598    | 1.2%     | 914                 | 1.2%     | 684                    | 1.2%     |
| Rural (population < 2,500)                   | 45,908   | 34.3%    | 25,118              | 32.5%    | 20,790                 | 36.8%    |
| Zip Code Unknown or Urbanicity Not Available | 218      | 0.2%     | 128                 | 0.2%     | 90                     | 0.2%     |
| Proxies for Socioeconomic Status (SES)       |          |          |                     |          |                        |          |
| Average Median Household Income2             | 59,622.2 | 21,799.8 | 58,985.9            | 21,350.7 | 60,495.3               | 22,364.7 |

|                                                       | Overall   |           | Evidence of outcome |           | No evidence of outcome |           |
|-------------------------------------------------------|-----------|-----------|---------------------|-----------|------------------------|-----------|
| Average Median Home Value <sup>2</sup>                | 199,788.4 | 131,753.5 | 196,061.4           | 124,651.5 | 204,903.1              | 140,480.7 |
| Average Percent Unemployment <sup>2</sup>             | 5.9       | 3.2       | 5.9                 | 3.2       | 5.7                    | 3.2       |
| Missingness in Proxies for Socioeconomic Status (SES) |           |           |                     |           |                        |           |
| Median Household Income Available                     | 128,353   | 95.9%     | 74,253              | 96.0%     | 54,100                 | 95.9%     |
| Median Home Value Available                           | 128,297   | 95.9%     | 74,211              | 95.9%     | 54,086                 | 95.9%     |
| Percent Unemployment Available                        | 128,581   | 96.1%     | 74,376              | 96.2%     | 54,205                 | 96.1%     |
| All SES Indicators Available                          | 128,167   | 95.8%     | 74,146              | 95.9%     | 54,021                 | 95.7%     |
| Recorded History Of Prior to Index Event (-183, -1)   |           |           |                     |           |                        |           |
| Adult BMI 19.9 or less                                | 1,971     | 1.5%      | 1,189               | 1.5%      | 782                    | 1.4%      |
| Adult BMI 20-29                                       | 16,905    | 12.6%     | 10,095              | 13.1%     | 6,810                  | 12.1%     |
| Adult BMI 30-39                                       | 21,226    | 15.9%     | 12,876              | 16.6%     | 8,350                  | 14.8%     |
| Adult BMI 40 or greater                               | 10,665    | 8.0%      | 6,575               | 8.5%      | 4,090                  | 7.2%      |
| Alcohol or Drug Abuse                                 | 5,740     | 4.3%      | 3,589               | 4.6%      | 2,151                  | 3.8%      |
| Alcohol Use Abuse                                     | 3,622     | 2.7%      | 2,312               | 3.0%      | 1,310                  | 2.3%      |
| Any Cancer                                            | 16,462    | 12.3%     | 9,842               | 12.7%     | 6,620                  | 11.7%     |
| Asthma                                                | 11,819    | 8.8%      | 6,704               | 8.7%      | 5,115                  | 9.1%      |
| Autoimmune Conditions                                 | 6,218     | 4.6%      | 3,673               | 4.7%      | 2,545                  | 4.5%      |
| Blood Stem Cell Transplant                            | 18        | 0.0%      | 11                  | 0.0%      | 7                      | 0.0%      |
| Chronic Kidney Disease                                | 44,858    | 33.5%     | 28,299              | 36.6%     | 16,559                 | 29.3%     |
| Congestive Heart Failure                              | 29,504    | 22.1%     | 19,169              | 24.8%     | 10,335                 | 18.3%     |
| Chronic Obstructive Pulmonary Disease (COPD)          | 31,467    | 23.5%     | 19,640              | 25.4%     | 11,827                 | 21.0%     |
| Coronary Artery Disease                               | 45,907    | 34.3%     | 28,802              | 37.2%     | 17,105                 | 30.3%     |
| Cystic Fibrosis                                       | 25        | 0.0%      | 12                  | 0.0%      | 13                     | 0.0%      |
| Diabetes Mellitus                                     | 59,820    | 44.7%     | 36,729              | 47.5%     | 23,091                 | 40.9%     |
| Drug Abuse Dependence                                 | 2,639     | 2.0%      | 1,577               | 2.0%      | 1,062                  | 1.9%      |
| HIV                                                   | 525       | 0.4%      | 321                 | 0.4%      | 204                    | 0.4%      |
| Hypertension                                          | 100,360   | 75.0%     | 59,695              | 77.2%     | 40,665                 | 72.1%     |
| Interstitial Lung Disease                             | 4,061     | 3.0%      | 2,703               | 3.5%      | 1,358                  | 2.4%      |
| Liver Disease                                         | 9,595     | 7.2%      | 5,863               | 7.6%      | 3,732                  | 6.6%      |
| Neurologic Conditions                                 | 29,662    | 22.2%     | 17,085              | 22.1%     | 12,577                 | 22.3%     |

|                                                             | Overall |       | Evidence of outcome |       | No evidence of outcome |       |
|-------------------------------------------------------------|---------|-------|---------------------|-------|------------------------|-------|
| Obesity                                                     | 41,509  | 31.0% | 25,023              | 32.4% | 16,486                 | 29.2% |
| Pulmonary Conditions                                        | 30,122  | 22.5% | 18,687              | 24.2% | 11,435                 | 20.3% |
| Sickle Cell Disease                                         | 324     | 0.2%  | 188                 | 0.2%  | 136                    | 0.2%  |
| Smoking                                                     | 33,087  | 24.7% | 20,096              | 26.0% | 12,991                 | 23.0% |
| Solid Organ or Stem Cell Transplant                         | 258     | 0.2%  | 173                 | 0.2%  | 85                     | 0.2%  |
| Solid Organ Transplant                                      | 240     | 0.2%  | 162                 | 0.2%  | 78                     | 0.1%  |
| Vascular Disease                                            | 108,364 | 81.0% | 64,231              | 83.0% | 44,133                 | 78.2% |
| Recorded Use Of Prior to Index Event (-1 83, -1)            |         |       |                     |       |                        |       |
| Chemotherapy                                                | 4,333   | 3.2%  | 2,598               | 3.4%  | 1,735                  | 3.1%  |
| Glucocorticoids Inhaled                                     | 14,855  | 11.1% | 9,009               | 11.6% | 5,846                  | 10.4% |
| Glucocorticoids NonSystemic                                 | 25,166  | 18.8% | 15,094              | 19.5% | 10,072                 | 17.9% |
| Glucocorticoids Ophthalmic                                  | 2,574   | 1.9%  | 1,562               | 2.0%  | 1,012                  | 1.8%  |
| Glucocorticoids Systemic                                    | 52,230  | 39.0% | 30,900              | 39.9% | 21,330                 | 37.8% |
| Glucocorticoids Topical                                     | 9,855   | 7.4%  | 5,860               | 7.6%  | 3,995                  | 7.1%  |
| Immune Modulators                                           | 7,270   | 5.4%  | 4,409               | 5.7%  | 2,861                  | 5.1%  |
| Immunosuppressants                                          | 4,005   | 3.0%  | 2,416               | 3.1%  | 1,589                  | 2.8%  |
| Recent Use Of Certain Treatments (-30, 0)                   |         |       |                     |       |                        |       |
| Angiotensin-converting enzyme (ACE) inhibitors              | 12,029  | 9.0%  | 6,919               | 8.9%  | 5,110                  | 9.1%  |
| Angiotensin receptor blockers (ARBs)                        | 11,314  | 8.5%  | 6,723               | 8.7%  | 4,591                  | 8.1%  |
| Vasopressors                                                | 2,142   | 1.6%  | 2,016               | 2.6%  | 126                    | 0.2%  |
| Comorbidity Burden (-183,-1)                                |         |       |                     |       |                        |       |
| Charlson/Elixhauser combined comorbidity score <sup>3</sup> | 3.0     | 3.4   | 3.3                 | 3.5   | 2.7                    | 3.2   |
| Symptoms at Diagnosis (-1, 14)                              |         |       |                     |       |                        |       |
| Cough                                                       | 32,719  | 24.5% | 18,330              | 23.7% | 14,389                 | 25.5% |
| Diarrhea                                                    | 13,778  | 10.3% | 7,404               | 9.6%  | 6,374                  | 11.3% |
| Dyspnea/Short of Breath                                     | 101,121 | 75.6% | 61,673              | 79.7% | 39,448                 | 69.9% |
| Fever                                                       | 30,892  | 23.1% | 18,573              | 24.0% | 12,319                 | 21.8% |
| Headache                                                    | 1,630   | 1.2%  | 929                 | 1.2%  | 701                    | 1.2%  |
| Malaise or Fatigue                                          | 44,610  | 33.3% | 25,355              | 32.8% | 19,255                 | 34.1% |

|                                                   | Overall |       | Evidence of outcome |      | No evidence of outcome |       |
|---------------------------------------------------|---------|-------|---------------------|------|------------------------|-------|
| Multisystem Inflammatory Syndrome                 | 93      | 0.1%  | 61                  | 0.1% | 32                     | 0.1%  |
| Myalgia                                           | 2,140   | 1.6%  | 1,050               | 1.4% | 1,090                  | 1.9%  |
| Nasal Congestion                                  | 689     | 0.5%  | 371                 | 0.5% | 318                    | 0.6%  |
| Nausea or Vomiting                                | 13,522  | 10.1% | 7,378               | 9.5% | 6,144                  | 10.9% |
| Smell or Taste Disturbance                        | 1,137   | 0.8%  | 561                 | 0.7% | 576                    | 1.0%  |
| Sore Throat                                       | 1,164   | 0.9%  | 615                 | 0.8% | 549                    | 1.0%  |
| Health Service Utilization Intensity (-183,-1)    |         |       |                     |      |                        |       |
| Mean number of ambulatory encounters              | 13.7    | 17.0  | 14.7                | 18.9 | 12.5                   | 13.9  |
| Mean number of emergency room encounters          | 1.3     | 2.8   | 1.4                 | 2.9  | 1.3                    | 2.6   |
| Mean number of inpatient hospital encounters      | 0.3     | 0.8   | 0.3                 | 0.8  | 0.2                    | 0.7   |
| Mean number of non-acute institutional encounters | 0.1     | 0.5   | 0.1                 | 0.5  | 0.1                    | 0.4   |
| Mean number of other ambulatory encounters        | 3.6     | 9.1   | 3.8                 | 9.5  | 3.3                    | 8.5   |
| Mean number of filled prescriptions               | 20.9    | 20.3  | 21.5                | 20.8 | 19.9                   | 19.7  |
| Mean number of generics dispensed                 | 8.9     | 6.0   | 9.2                 | 6.1  | 8.5                    | 5.9   |
| Mean number of unique drug classes dispensed      | 8.3     | 5.5   | 8.6                 | 5.6  | 8.0                    | 5.3   |

Footnotes: 1Value represents standard deviation where no % follows the value. 2These variables were calculated only among those with a known SES information. 3The Charlson/Elixhauser Combined Comorbidity Score is calculated based on comorbidities observed during a requester-defined window around the exposure episode start date. (Gagne JJ, Glynn RJ, Avorn J, Levin R, Schneeweiss S. A combined comorbidity score predicted mortality in elderly patients better than existing scores. J Clin Epidemiol. 2011;64(7):749-759) N/A: Not Applicable

## Additional File 6: Baseline Characteristics of Individuals Hospitalized with COVID-19 (U07.1 diagnosis code in the inpatient care setting) between April 1, 2020 and March 31, 2021 in the Sentinel Distributed Database, Overall and by Evidence of Outcome of Recorded Inpatient Death

| Patient Characteristics                   | Overall     |                                             | Evidence of outcome |                                             | No evidence of outcome |                                             |
|-------------------------------------------|-------------|---------------------------------------------|---------------------|---------------------------------------------|------------------------|---------------------------------------------|
|                                           | Number/Mean | Percent/<br>Standard Deviation <sup>1</sup> | Number/Mean         | Percent/<br>Standard Deviation <sup>1</sup> | Number/Mean            | Percent/<br>Standard Deviation <sup>1</sup> |
| Unique patients                           | 133,773     | N/A                                         | 19,002              | N/A                                         | 114,771                | N/A                                         |
| Demographic Characteristics               |             |                                             |                     |                                             |                        |                                             |
| Age (years)                               | 71.6        | 13.1                                        | 76.6                | 10.0                                        | 70.8                   | 13.4                                        |
| Age                                       |             |                                             |                     |                                             |                        |                                             |
| 0-5 years                                 | 78          | 0.1%                                        | 1                   | 0.0%                                        | 77                     | 0.1%                                        |
| 6-11 years                                | 43          | 0.0%                                        | 0                   | 0.0%                                        | 43                     | 0.0%                                        |
| 12-18 years                               | 187         | 0.1%                                        | 1                   | 0.0%                                        | 186                    | 0.2%                                        |
| 19-29 years                               | 1,268       | 0.9%                                        | 10                  | 0.1%                                        | 1,258                  | 1.1%                                        |
| 30-39 years                               | 2,723       | 2.0%                                        | 47                  | 0.2%                                        | 2,676                  | 2.3%                                        |
| 40-49 years                               | 5,002       | 3.7%                                        | 205                 | 1.1%                                        | 4,797                  | 4.2%                                        |
| 50-64 years                               | 21,935      | 16.4%                                       | 1,721               | 9.1%                                        | 20,214                 | 17.6%                                       |
| 65-74 years                               | 44,797      | 33.5%                                       | 6,051               | 31.8%                                       | 38,746                 | 33.8%                                       |
| ≥ 75 years                                | 57,740      | 43.2%                                       | 10,966              | 57.7%                                       | 46,774                 | 40.8%                                       |
| Sex                                       |             |                                             |                     |                                             |                        |                                             |
| Female                                    | 64,820      | 48.5%                                       | 7,748               | 40.8%                                       | 57,072                 | 49.7%                                       |
| Male                                      | 68,953      | 51.5%                                       | 11,254              | 59.2%                                       | 57,699                 | 50.3%                                       |
| Race                                      |             |                                             |                     |                                             |                        |                                             |
| American Indian or Alaska Native          | 550         | 0.4%                                        | 93                  | 0.5%                                        | 457                    | 0.4%                                        |
| Asian                                     | 1,984       | 1.5%                                        | 285                 | 1.5%                                        | 1,699                  | 1.5%                                        |
| Black or African American                 | 23,583      | 17.6%                                       | 3,356               | 17.7%                                       | 20,227                 | 17.6%                                       |
| Native Hawaiian or Other Pacific Islander | 1,188       | 0.9%                                        | 207                 | 1.1%                                        | 981                    | 0.9%                                        |
| Unknown                                   | 31,330      | 23.4%                                       | 3,636               | 19.1%                                       | 27,694                 | 24.1%                                       |
| White                                     | 75,138      | 56.2%                                       | 11,425              | 60.1%                                       | 63,713                 | 55.5%                                       |
| Hispanic origin                           |             |                                             |                     |                                             |                        |                                             |

|                                              | Overall  |          | Evidence of outcome |          | No evidence of outcome |          |
|----------------------------------------------|----------|----------|---------------------|----------|------------------------|----------|
| Yes                                          | 5,757    | 4.3%     | 741                 | 3.9%     | 5,016                  | 4.4%     |
| No                                           | 78,836   | 58.9%    | 12,208              | 64.2%    | 66,628                 | 58.1%    |
| Unknown                                      | 49,180   | 36.8%    | 6,053               | 31.9%    | 43,127                 | 37.6%    |
| Month-Year of Cohort Entry                   |          |          |                     |          |                        |          |
| April 2020                                   | 7,011    | 5.2%     | 1,436               | 7.6%     | 5,575                  | 4.9%     |
| May 2020                                     | 3,624    | 2.7%     | 545                 | 2.9%     | 3,079                  | 2.7%     |
| June 2020                                    | 3,963    | 3.0%     | 520                 | 2.7%     | 3,443                  | 3.0%     |
| July 2020                                    | 10,709   | 8.0%     | 1,565               | 8.2%     | 9,144                  | 8.0%     |
| August 2020                                  | 7,234    | 5.4%     | 986                 | 5.2%     | 6,248                  | 5.4%     |
| September 2020                               | 5,374    | 4.0%     | 734                 | 3.9%     | 4,640                  | 4.0%     |
| October 2020                                 | 9,445    | 7.1%     | 1,258               | 6.6%     | 8,187                  | 7.1%     |
| November 2020                                | 20,025   | 15.0%    | 2,928               | 15.4%    | 17,097                 | 14.9%    |
| December 2020                                | 26,996   | 20.2%    | 4,071               | 21.4%    | 22,925                 | 20.0%    |
| January 2021                                 | 22,864   | 17.1%    | 3,276               | 17.2%    | 19,588                 | 17.1%    |
| February 2021                                | 9,868    | 7.4%     | 1,256               | 6.6%     | 8,612                  | 7.5%     |
| March 2021                                   | 6,660    | 5.0%     | 427                 | 2.2%     | 6,233                  | 5.4%     |
| Census Bureau (CB) Region                    |          |          |                     |          |                        |          |
| Midwest                                      | 28,500   | 21.3%    | 4,059               | 21.4%    | 24,441                 | 21.3%    |
| Northeast                                    | 16,960   | 12.7%    | 2,458               | 12.9%    | 14,502                 | 12.6%    |
| South                                        | 72,471   | 54.2%    | 10,264              | 54.0%    | 62,207                 | 54.2%    |
| West                                         | 15,626   | 11.7%    | 2,204               | 11.6%    | 13,422                 | 11.7%    |
| CB Region (Invalid)                          | 66       | 0.0%     | 13                  | 0.1%     | 53                     | 0.0%     |
| CB Region (Missing)                          | 46       | 0.0%     | 2                   | 0.0%     | 44                     | 0.0%     |
| CB Region (Other)                            | 104      | 0.1%     | 2                   | 0.0%     | 102                    | 0.1%     |
| Urbanicity                                   |          |          |                     |          |                        |          |
| Urban (population >= 50,000)                 | 86,049   | 64.3%    | 11,816              | 62.2%    | 74,233                 | 64.7%    |
| Suburban (population 2,500 - 49,999)         | 1,598    | 1.2%     | 222                 | 1.2%     | 1,376                  | 1.2%     |
| Rural (population < 2,500)                   | 45,908   | 34.3%    | 6,947               | 36.6%    | 38,961                 | 33.9%    |
| Zip Code Unknown or Urbanicity Not Available | 218      | 0.2%     | 17                  | 0.1%     | 201                    | 0.2%     |
| Proxies for Socioeconomic Status (SES)       |          |          |                     |          |                        |          |
| Average Median Household Income2             | 59,622.2 | 21,799.8 | 57,853.1            | 20,972.4 | 59,917.4               | 21,925.5 |

|                                                       | Overall   |           | Evidence of outcome |           | No evidence of outcome |           |
|-------------------------------------------------------|-----------|-----------|---------------------|-----------|------------------------|-----------|
| Average Median Home Value <sup>2</sup>                | 199,788.4 | 131,753.5 | 193,204.9           | 131,186.2 | 200,887.1              | 131,835.1 |
| Average Percent Unemployment <sup>2</sup>             | 5.9       | 3.2       | 6.0                 | 3.2       | 5.8                    | 3.2       |
| Missingness in Proxies for Socioeconomic Status (SES) |           |           |                     |           |                        |           |
| Median Household Income Available                     | 128,353   | 95.9%     | 18,355              | 96.6%     | 109,998                | 95.8%     |
| Median Home Value Available                           | 128,297   | 95.9%     | 18,349              | 96.6%     | 109,948                | 95.8%     |
| Percent Unemployment Available                        | 128,581   | 96.1%     | 18,388              | 96.8%     | 110,193                | 96.0%     |
| All SES Indicators Available                          | 128,167   | 95.8%     | 18,332              | 96.5%     | 109,835                | 95.7%     |
| Recorded History Of Prior to Index Event (-183, -1)   |           |           |                     |           |                        |           |
| Adult BMI 19.9 or less                                | 1,971     | 1.5%      | 377                 | 2.0%      | 1,594                  | 1.4%      |
| Adult BMI 20-29                                       | 16,905    | 12.6%     | 2,584               | 13.6%     | 14,321                 | 12.5%     |
| Adult BMI 30-39                                       | 21,226    | 15.9%     | 3,196               | 16.8%     | 18,030                 | 15.7%     |
| Adult BMI 40 or greater                               | 10,665    | 8.0%      | 1,429               | 7.5%      | 9,236                  | 8.0%      |
| Alcohol or Drug Abuse                                 | 5,740     | 4.3%      | 835                 | 4.4%      | 4,905                  | 4.3%      |
| Alcohol Use Abuse                                     | 3,622     | 2.7%      | 596                 | 3.1%      | 3,026                  | 2.6%      |
| Any Cancer                                            | 16,462    | 12.3%     | 2,864               | 15.1%     | 13,598                 | 11.8%     |
| Asthma                                                | 11,819    | 8.8%      | 1,415               | 7.4%      | 10,404                 | 9.1%      |
| Autoimmune Conditions                                 | 6,218     | 4.6%      | 908                 | 4.8%      | 5,310                  | 4.6%      |
| Blood Stem Cell Transplant                            | 18        | 0.0%      | 4                   | 0.0%      | 14                     | 0.0%      |
| Chronic Kidney Disease                                | 44,858    | 33.5%     | 8,203               | 43.2%     | 36,655                 | 31.9%     |
| Congestive Heart Failure                              | 29,504    | 22.1%     | 5,711               | 30.1%     | 23,793                 | 20.7%     |
| Chronic Obstructive Pulmonary Disease (COPD)          | 31,467    | 23.5%     | 5,342               | 28.1%     | 26,125                 | 22.8%     |
| Coronary Artery Disease                               | 45,907    | 34.3%     | 8,179               | 43.0%     | 37,728                 | 32.9%     |
| Cystic Fibrosis                                       | 25        | 0.0%      | 3                   | 0.0%      | 22                     | 0.0%      |
| Diabetes Mellitus                                     | 59,820    | 44.7%     | 9,625               | 50.7%     | 50,195                 | 43.7%     |
| Drug Abuse Dependence                                 | 2,639     | 2.0%      | 289                 | 1.5%      | 2,350                  | 2.0%      |
| HIV                                                   | 525       | 0.4%      | 62                  | 0.3%      | 463                    | 0.4%      |
| Hypertension                                          | 100,360   | 75.0%     | 15,582              | 82.0%     | 84,778                 | 73.9%     |
| Interstitial Lung Disease                             | 4,061     | 3.0%      | 885                 | 4.7%      | 3,176                  | 2.8%      |
| Liver Disease                                         | 9,595     | 7.2%      | 1,551               | 8.2%      | 8,044                  | 7.0%      |
| Neurologic Conditions                                 | 29,662    | 22.2%     | 5,131               | 27.0%     | 24,531                 | 21.4%     |

|                                                             | Overall |       | Evidence of outcome |       | No evidence of outcome |       |
|-------------------------------------------------------------|---------|-------|---------------------|-------|------------------------|-------|
| Obesity                                                     | 41,509  | 31.0% | 5,970               | 31.4% | 35,539                 | 31.0% |
| Pulmonary Conditions                                        | 30,122  | 22.5% | 5,009               | 26.4% | 25,113                 | 21.9% |
| Sickle Cell Disease                                         | 324     | 0.2%  | 37                  | 0.2%  | 287                    | 0.3%  |
| Smoking                                                     | 33,087  | 24.7% | 5,396               | 28.4% | 27,691                 | 24.1% |
| Solid Organ or Stem Cell Transplant                         | 258     | 0.2%  | 35                  | 0.2%  | 223                    | 0.2%  |
| Solid Organ Transplant                                      | 240     | 0.2%  | 31                  | 0.2%  | 209                    | 0.2%  |
| Vascular Disease                                            | 108,364 | 81.0% | 16,698              | 87.9% | 91,666                 | 79.9% |
| Recorded Use Of Prior to Index Event (-1 83, -1)            |         |       |                     |       |                        |       |
| Chemotherapy                                                | 4,333   | 3.2%  | 766                 | 4.0%  | 3,567                  | 3.1%  |
| Glucocorticoids Inhaled                                     | 14,855  | 11.1% | 2,231               | 11.7% | 12,624                 | 11.0% |
| Glucocorticoids NonSystemic                                 | 25,166  | 18.8% | 3,859               | 20.3% | 21,307                 | 18.6% |
| Glucocorticoids Ophthalmic                                  | 2,574   | 1.9%  | 425                 | 2.2%  | 2,149                  | 1.9%  |
| Glucocorticoids Systemic                                    | 52,230  | 39.0% | 7,756               | 40.8% | 44,474                 | 38.8% |
| Glucocorticoids Topical                                     | 9,855   | 7.4%  | 1,546               | 8.1%  | 8,309                  | 7.2%  |
| Immune Modulators                                           | 7,270   | 5.4%  | 1,291               | 6.8%  | 5,979                  | 5.2%  |
| Immunosuppressants                                          | 4,005   | 3.0%  | 637                 | 3.4%  | 3,368                  | 2.9%  |
| Recent Use Of Certain Treatments (-30, 0)                   |         |       |                     |       |                        |       |
| Angiotensin-converting enzyme (ACE) inhibitors              | 12,029  | 9.0%  | 1,720               | 9.1%  | 10,309                 | 9.0%  |
| Angiotensin receptor blockers (ARBs)                        | 11,314  | 8.5%  | 1,623               | 8.5%  | 9,691                  | 8.4%  |
| Vasopressors                                                | 2,142   | 1.6%  | 1,151               | 6.1%  | 991                    | 0.9%  |
| Comorbidity Burden (-183,-1)                                |         |       |                     |       |                        |       |
| Charlson/Elixhauser combined comorbidity score <sup>3</sup> | 3.0     | 3.4   | 3.9                 | 3.7   | 2.9                    | 3.3   |
| Symptoms at Diagnosis (-1, 14)                              |         |       |                     |       |                        |       |
| Cough                                                       | 32,719  | 24.5% | 3,879               | 20.4% | 28,840                 | 25.1% |
| Diarrhea                                                    | 13,778  | 10.3% | 1,445               | 7.6%  | 12,333                 | 10.7% |
| Dyspnea/Short of Breath                                     | 101,121 | 75.6% | 16,012              | 84.3% | 85,109                 | 74.2% |
| Fever                                                       | 30,892  | 23.1% | 4,408               | 23.2% | 26,484                 | 23.1% |
| Headache                                                    | 1,630   | 1.2%  | 158                 | 0.8%  | 1,472                  | 1.3%  |
| Malaise or Fatigue                                          | 44,610  | 33.3% | 5,549               | 29.2% | 39,061                 | 34.0% |

|                                                   | Overall |       | Evidence of outcome |      | No evidence of outcome |       |
|---------------------------------------------------|---------|-------|---------------------|------|------------------------|-------|
| Multisystem Inflammatory Syndrome                 | 93      | 0.1%  | 8                   | 0.0% | 85                     | 0.1%  |
| Myalgia                                           | 2,140   | 1.6%  | 152                 | 0.8% | 1,988                  | 1.7%  |
| Nasal Congestion                                  | 689     | 0.5%  | 59                  | 0.3% | 630                    | 0.5%  |
| Nausea or Vomiting                                | 13,522  | 10.1% | 1,310               | 6.9% | 12,212                 | 10.6% |
| Smell or Taste Disturbance                        | 1,137   | 0.8%  | 76                  | 0.4% | 1,061                  | 0.9%  |
| Sore Throat                                       | 1,164   | 0.9%  | 103                 | 0.5% | 1,061                  | 0.9%  |
| Health Service Utilization Intensity (-183,-1)    |         |       |                     |      |                        |       |
| Mean number of ambulatory encounters              | 13.7    | 17.0  | 15.6                | 18.9 | 13.4                   | 16.6  |
| Mean number of emergency room encounters          | 1.3     | 2.8   | 1.4                 | 2.9  | 1.3                    | 2.8   |
| Mean number of inpatient hospital encounters      | 0.3     | 0.8   | 0.4                 | 0.8  | 0.3                    | 0.7   |
| Mean number of non-acute institutional encounters | 0.1     | 0.5   | 0.2                 | 0.5  | 0.1                    | 0.4   |
| Mean number of other ambulatory encounters        | 3.6     | 9.1   | 4.3                 | 9.9  | 3.5                    | 9.0   |
| Mean number of filled prescriptions               | 20.9    | 20.3  | 23.7                | 22.6 | 20.4                   | 19.9  |
| Mean number of generics dispensed                 | 8.9     | 6.0   | 9.7                 | 6.1  | 8.8                    | 6.0   |
| Mean number of unique drug classes dispensed      | 8.3     | 5.5   | 9.1                 | 5.5  | 8.2                    | 5.5   |

Footnotes: 1Value represents standard deviation where no % follows the value. 2These variables were calculated only among those with a known SES information. 3The Charlson/Elixhauser Combined Comorbidity Score is calculated based on comorbidities observed during a requester-defined window around the exposure episode start date. (Gagne JJ, Glynn RJ, Avorn J, Levin R, Schneeweiss S. A combined comorbidity score predicted mortality in elderly patients better than existing scores. J Clin Epidemiol. 2011;64(7):749-759) N/A: Not Applicable
